1  
2 **Apoptotic Find-me Signals are an Essential Driver of Stem Cell Conversion To**  
3 **The Cardiac Lineage**

4  
5  
6 Loic Fort<sup>1</sup>, Vivian Gama<sup>1</sup>, and Ian G. Macara<sup>1\*</sup>

7 <sup>1</sup>Dept of Cell and Developmental Biology

8 Vanderbilt University School of Medicine

9 Nashville TN 37240

10  
11 \*Contact information:

12 [ian.g.macara@vanderbilt.edu](mailto:ian.g.macara@vanderbilt.edu)

13 615-875-5565

14  
15 **Abstract**

16 Pluripotent stem cells can be driven by manipulation of Wnt signaling through a series of states  
17 similar to those that occur during early embryonic development, transitioning from an epithelial  
18 phenotype into the cardiogenic mesoderm lineage and ultimately into functional cardiomyocytes  
19 <sup>1-4</sup>. Strikingly, we observed that induced pluripotent stem cells (iPSCs) and embryonic stem cells  
20 (ESCs) undergo widespread apoptosis upon Wnt activation, followed by a synchronous  
21 epithelial-mesenchymal transition (EMT). The EMT requires induction of transcription factors  
22 *SNAI1/SNAI2* downstream of *MESP1* expression, and double knock-out of *SNAI1/2*, or loss of  
23 *MESP1* in iPSCs blocks EMT and prevents cardiac differentiation. Remarkably, blockade of  
24 early apoptosis chemically or by ablation of pro-apoptotic genes also completely prevents the  
25 EMT, suppressing even the earliest events in mesoderm conversion, including *EOMES*, *TBX6*,  
26 and *MESP1* induction. Conditioned medium from WNT-activated WT iPSCs overcomes the  
27 block to EMT by cells incapable of apoptosis (Apop-), suggesting the involvement of soluble  
28 factors from apoptotic cells in mesoderm conversion. Treatment with a purinergic P2Y receptor  
29 inhibitor or addition of apyrase demonstrated a requirement for nucleotide triphosphate  
30 signaling. ATP was sufficient to induce a partial EMT in Apop- cells treated with WNT activator.  
31 We conclude that nucleotides, in addition to acting as chemo-attractants for clearance of  
32 apoptotic cells can, unexpectedly, function as essential paracrine signals in mesoderm  
33 specification.

35 **Main**

36

37 A mesenchymal-epithelial transition (MET) is an early and essential event during  
38 reprogramming by the Yamanaka factors *SOX2*, *OCT4*, *c-MYC* and *KLF4*<sup>5-7</sup>. During  
39 reprogramming of mouse fibroblasts, *SOX2* and *OCT4* suppress *SNAI1/2* and *ZEB1/2*, which  
40 are key transcription factors that promote the reverse process, an epithelial-mesenchymal  
41 transition (EMT), while *c-MYC* represses TGF $\beta$  signaling and *KLF4* induces epithelial gene  
42 expression<sup>8,9</sup>. EMT occurs during gastrulation as epithelial epiblast cells ingress through the  
43 primitive streak<sup>10</sup>. EMT is obligatory for ESCs to differentiate into definitive endoderm<sup>11</sup>, while a  
44 sequential EMT/MET occurs during the conversion of the hepatocyte lineage<sup>12</sup>. However, the  
45 reason why these processes are required for reprogramming and differentiation remains  
46 unknown.

47

48 **Initiation of cardiomyocyte specification triggers apoptosis followed by an EMT**

49 Human iPSCs (GM25256) used in this study expressed appropriate pluripotency markers  
50 (NANOG, *OCT4*, *SOX2*) and epithelial polarity proteins including *SCRB*, *LLGL2*, *PAR-3*, *PKC-*  
51 *zeta* and *PALS1* (Supplementary Fig S1A). They assemble ZO-1 positive tight junctions (TJ)  
52 and E-cadherin positive adherens junctions (AJ), localize polarity proteins appropriately, and  
53 form cell monolayers with a cobblestone appearance (Fig 1A). Treatment with a WNT activator  
54 (CHIR 99021) for 48 hrs followed by treatment with a WNT signaling inhibitor (Fig 1B) was used  
55 to drive cardiomyocyte specification<sup>2</sup>. This protocol promoted exit from pluripotency and the  
56 sequential induction of mid-primitive streak, marked by induction of *EOMES* and *TBXT* (Bra/T)  
57 from 9 - 36 hrs; lateral mesoderm, marked by induction of *TBX6* and *MESP1* from 36 – 48 hrs,  
58 and cardiac mesoderm, marked by induction of *ISL1*, *NKX2.5* and *ANP*, for 48 – 72 hrs  
59 (Supplementary Fig S1B, C). Consistent with previous data<sup>1,2</sup>, spontaneous beating of immature  
60 cardiomyocytes was observed after 10-12 days (Supplementary Video 1). Cardiac specification  
61 was accompanied by loss of E-cadherin, and expression of *Slug* and *Vimentin* (Supplementary  
62 Fig S1D-E).

63 Strikingly, early induction of cardiomyocyte specification resulted in extensive cell extrusion (Fig  
64 1C and Supplementary Video 2), caused by apoptosis that began within 12 hours, and slowly  
65 diminished over 2 days, as measured by cleaved caspase 3, cleaved PARP, and Annexin  
66 exposure (Fig 1 D-H). This was followed at 49-50 hrs by an abrupt wave of intercellular junction  
67 disassembly that occurred throughout the culture and was complete within ~2 hrs (Fig 1I;  
68 Supplementary video 2). Cell-cell contacts and cortical actin were lost, with acquisition of stress  
69 fibers and a spindle-shaped morphology (Fig 1 I,J). Surprisingly, expression of the AJ-marker E-

70 cadherin did not diminish until ~24 hrs after junction disassembly (Fig 1K). Nonetheless, other  
71 markers of EMT were detected, including Snail and Slug, and the mesenchymal marker  
72 vimentin (Fig 1K, Supplementary Fig S1 D-E). Importantly, both apoptosis and EMT also  
73 occurred in hESCs that were driven along the cardiac mesoderm lineage, with increased PARP  
74 cleavage over the initial 2 days (Supplementary Fig S1F-G), followed by increased Snail and  
75 Slug (Supplementary Fig S1H). Importantly, the extensive apoptosis we observed is specific to  
76 Wnt activation, as treatment with retinoic acid does not stimulate cell death<sup>13</sup>.  
77 The global EMT occurs almost immediately after addition of IWP-2 inhibitor in the standard  
78 protocol for cardiomyocyte induction (Fig 1I-K). However, the causal relationship between these  
79 two events was unclear. Therefore, we initiated mesoderm induction by addition of CHIR but  
80 withheld inhibitor at 48 hrs and did not remove the CHIR. Notably, the EMT still occurred on  
81 schedule in these cells (Fig 1L and Supplementary Fig S1I), demonstrating that it is  
82 independent of WNT inhibition and that, with astonishing fidelity, the iPSCs can synchronously  
83 time the EMT to a 1 – 2 hr window 2 days after WNT activation.

84

#### 85 **EMT is driven by the induction of *SNAI1* and *SNAI2*, downstream of *MESP1***

86 To investigate the mechanism of EMT, we first used RT-qPCR to analyze *SNAI1/2* induction  
87 and found that *SNAI1* peaks at ~50hrs while *SNAI2* peaks at about 72 hrs (Fig 2A), as also  
88 detected by immunoblot (Fig. 1K). We next asked if the observed EMT is dependent on *SNAI1*  
89 and/or *SNAI2*, by CRISPR/Cas9-mediated gene editing in the iPSCs (Fig 2 B,C). Knockout of  
90 either gene alone had little effect because of compensatory induction of the remaining gene  
91 (data not shown), but a double knockout (DKO) of *SNAI1/2* efficiently blocked the EMT (Fig 2D).  
92 Moreover, these cells did not continue down the cardiac mesoderm lineage. They did not  
93 express key cardiac markers such as *NKX2.5* and *cTNT* and showed a reduced expression of  
94 *GATA4* (Fig. 2E). We conclude that the EMT induced in response to WNT activation in iPSCs is  
95 driven by expression of Snail and Slug, and that these factors are essential for specification of  
96 the cardiac lineage.  
97 *MESP1* is a pioneer cardiac factor in vivo. During embryonic stem cell differentiation, *MESP1* is  
98 expressed in ESC-derived cardiac mesoderm progenitors, and is required for cardiac mesoderm  
99 specification<sup>14</sup>. Moreover, *MESP1* regulates expression of multiple EMT-promoting genes  
100 including *SNAI1/2*. Consistent with these data, we found that CRISPR/Cas9-mediated KO of  
101 *MESP1* (Fig 2F) prevented induction of *SNAI1/2* (Fig 2F), blocked the scheduled EMT at 49hrs  
102 post-addition of CHIR (Fig 2G), suppressed expression of *NKX2.5*, *HAND1*, *cTNT* and *GATA4*  
103 (Fig 2H) and prevented differentiation into cardiomyocytes (Supp.Video 3). We conclude that

104 *MESP1* during mesoderm conversion induces *SNAI1/2*, which in turn drive a synchronous EMT  
105 that is essential for further differentiation along the cardiac lineage.

106

### 107 **Apoptosis is an essential antecedent to *SNAI1/SNAI2* induction and EMT**

108 The initial CHIR treatment of iPSCs caused a rapid, widespread apoptosis, as detected by  
109 cleaved caspase 3, PARP cleavage, and Annexin exposure (Fig 1C-H). During this time  
110 surviving cells continued to proliferate, increasing the overall cell density (Fig 3A, Supp. Fig  
111 S3G-H).

112 To test whether apoptosis has any impact on EMT and conversion along the cardiac mesoderm  
113 lineage, we blocked cell death in cultures treated with CHIR, using the pan-caspase inhibitor Q-  
114 VD-OPH. Remarkably, this drug totally prevented the scheduled EMT (Fig. 3A). The cells  
115 maintained a cobblestone appearance, retained tight junctions, grew to high density (Supp. Fig  
116 S3G), and failed to express Snail or Slug (Fig 3A-C). Inhibition of apoptosis was marked by loss  
117 of cleaved Caspase 3 and PARP (Fig 3B). A similar effect of Q-VD-OPH on EMT was observed  
118 in human ESCs (Supp. Fig S3A-C).

119 To validate the connection to cell death we generated iPSC lines deleted for the apoptotic  
120 executioner proteases Caspase 3 or Caspase 9, using CRISPR/Cas9-mediated gene editing  
121 (Supp. Fig S3D). These lines did not proliferate as rapidly as the parental WT or the control non-  
122 target (NT) iPSCs, but nonetheless formed island cultures. Notably, treatment with CHIR did not  
123 cause TJ disassembly, even after prolonged incubation, and did not induce *SNAI1/2* (Supp. Fig  
124 3E-F).

125 Next, to prevent the apoptotic events upstream of caspase activation, we deleted the pro-  
126 apoptotic genes *BAX* and *BAK*<sup>15</sup>. Unlike the Caspase 3 and 9 KO lines, these double knockout  
127 (DKO) cells grew at rates comparable to control cells (Supp. Fig S3H), but again, no EMT was  
128 detected after treatment with CHIR as determined by persistence of TJs (Fig 3D) and by the  
129 absence of Snail and Slug expression at both the protein and mRNA levels (Fig 3E – G).

130 Moreover, cardiomyocyte differentiation was also blocked (Fig 3H; Supp. Fig 3I and Supp.Video  
131 4). Similarly, addition of Q-VD-OPH during both, CHIR-99021 and IWP-2 steps, blocks induction  
132 of the cardiac marker *HAND1* (Supp. Fig S3J).

133 Together, these data strongly support an unanticipated requirement for apoptosis, induced after  
134 WNT activation, to permit the entry of pluripotent cells into the mesoderm lineage. We note that  
135 cell death has been observed in early mouse embryos, just prior to gastrulation and in primitive  
136 streak, although its function is unknown<sup>16</sup>.

137



138 **Apoptosis is required very early in selection of the mesoderm lineage**

139 To determine at which stage apoptosis permits pluripotent stem cells to differentiate towards  
140 cardiomyocytes, we treated *BAX/BAK* DKO iPSCs with CHIR, then harvested cells at 46 hrs for  
141 QRT-PCR. Surprisingly, even very early changes in gene expression, including *TBXT* (*T/Bra*)  
142 and *EOMES* were drastically reduced or suppressed. A similar suppression was caused by the  
143 treatment of WT iPSCs with QVD-OPH prior to addition of CHIR (Fig 4B). The failure to express  
144 these genes was confirmed by immunofluorescence (Fig. 4C) and by immunoblotting for *T/Bra*  
145 (Fig. 4D). Later changes associated with mesoderm induction, including *TBX6* and *MESP1*  
146 were also inhibited (Fig. 4A-B); however, expression of the pluripotent marker *Nanog* decreased  
147 on schedule (Fig 4E). Importantly, DKO iPSCs lacking *BAX* and *BAK* can still enter the neuronal  
148 lineage<sup>15</sup>.

149 These data suggest that, even though apoptosis continues to occur for >40 hours after  
150 activation of WNT signaling, it is necessary for a very early event following initiation of  
151 mesoderm specification. To further test this hypothesis, we treated WT iPSCs with CHIR and  
152 added Q-VD-OPH only for the first 24 hrs, after which time the medium was replaced to CHIR  
153 alone for an additional 48 hrs (Fig 4F) or, as a control, iPSCs were treated with CHIR alone until  
154 24 hrs had passed, then incubated with CHIR + Q-VD-OPH (Supp. Fig S4C). Notably, early  
155 addition of this inhibitor completely blocked the subsequent EMT and strongly reduced  
156 Snail/Slug induction (Fig. 4G-H); but addition after 24 hrs had no effect and EMT occurred on  
157 schedule (Supp. Fig S4C-D)). Together, these data highlight an unanticipated essential role for  
158 apoptosis in the initial steps towards mesoderm specification.

159

160 **A soluble factor from apoptotic cells permits pluripotent cells to enter the mesoderm**  
161 **lineage**

162 How might apoptosis allow pluripotent stem cells to enter the cardiac mesoderm lineage? We  
163 considered two possibilities. First, cell death might relax the space constraints between cells in  
164 a colony, allowing them to stretch and generate tension, which in principle could activate  
165 signaling through YAP/TAZ or some other pathway to promote mesoderm conversion.  
166 Alternatively, apoptotic cells might release a soluble factor that promotes mesoderm conversion.  
167 We discounted the first hypothesis as unlikely, because we did not detect any increase in  
168 nuclear YAP localization after CHIR treatment (Supp. Fig S5A). To test the second hypothesis,  
169 we treated both WT and the *BAK/BAX* DKO iPSCs for 24 hrs with CHIR then replaced the DKO  
170 medium with conditioned medium (CM) from the apoptosing WT iPSCs, and continued to  
171 incubate the DKO cells for a further 48 hrs (Fig 5A). Remarkably, the DKO cells receiving the

172 CM underwent a dramatic EMT (Fig 5B). To test if the CM also relieved the blockade to  
173 expression of mesoderm lineage genes caused by the inability of the DKO cells to undergo  
174 apoptosis, we performed RT-qPCR and found significant increases in *EOMES*, *MESP1*, *TBX6*,  
175 and *SNAI1/2* (Fig 5C). These results clearly demonstrate that a soluble factor released by  
176 WNT-induced apoptosis of iPSCs is required for mesoderm conversion and consequent EMT of  
177 the surviving iPSC population.

178

### 179 **ATP provides an essential signal through the purinergic P2Y receptor**

180 Apoptotic cells generate soluble find-me signals that recruit macrophages and membrane-  
181 associated eat-me signals to promote engulfment<sup>17,18</sup>. Nucleotides (ATP, UTP) have been  
182 identified as potent find-me signals<sup>19</sup>. We first tested, using a luciferase assay, whether  
183 apoptosing iPSCs release ATP. Treatment with CHIR caused a significant increase in  
184 extracellular ATP within 8 hrs (Fig 5D). Moreover, treatment with apyrase, to hydrolyze  
185 nucleotides, partially blunted the EMT induced by CM on *BAX/BAK* DKO (Fig. 5E-F). This result  
186 was confirmed in a setting where apoptosis was blocked in WT cells using Q-VD-OPH for 24hrs  
187 prior to adding the CM +/- apyrase (Supp. Fig S5B-C). Moreover, WT hiPSCs co-treated with  
188 CHIR and apyrase showed a two-fold reduction in Snail and Slug expression (Fig 5G, H).  
189 Purinergic P2Y receptors bind ATP among other nucleotides, and function as chemo-attractants  
190 for macrophages<sup>19,20</sup>. Strikingly, the P2 receptor inhibitor suramin totally blocked EMT in WT  
191 iPSCs treated with CHIR, even though many of these cells still underwent apoptosis (Fig 5I).  
192 Snail and Slug were also completely suppressed (Fig. 5J-K). Additionally, suramin blocked the  
193 effect of CM on *BAK/BAX* DKO cells, preventing EMT and accompanying gene expression  
194 changes (Fig 5L-M).

195 Finally, addition of ATP to *BAK/BAX* DKO cells treated with CHIR also induced a partial EMT  
196 (Fig 5N-P). However, induction of apoptosis by UV irradiation, in the absence of WNT signaling,  
197 did not cause EMT (Supp. Fig. S5D-E).

198 We conclude, therefore, that WNT signaling induces two distinct and complementary responses  
199 in pluripotent stem cells, both of which are needed for commitment to cardiogenesis: the first  
200 activating early apoptosis, triggering the release of nucleotides, including ATP, which through  
201 P2Y receptor engagement act in a paracrine fashion to permit the stem cells to enter the  
202 mesoderm lineage; while the second drives differentiation of the responsive cells through  
203 primitive streak towards cardiac mesoderm (Supp. Fig S5F).

204

205

## 206 Discussion

207 Apoptotic cells release find-me and eat-me signals that ensure their rapid clearance from  
208 tissues by macrophages and other phagocytic cells<sup>7,18</sup>. Find-me signals include several  
209 molecules, including nucleotides that are recognized by purinergic G-protein coupled P2Y  
210 receptors and act as chemo-attractants<sup>9</sup>. P2Y agonists have multiple biological functions in  
211 addition to apoptotic clearance<sup>20</sup> but have not previously been implicated in early developmental  
212 decisions. Our discovery that suppression of apoptosis in human iPSCs and ESCs completely  
213 blocks specification along the mesoderm lineage in response to WNT activation was, therefore,  
214 highly unexpected. Even early changes in gene expression, such as the induction of EOMES,  
215 are prevented, resulting in a later block in *SNAI1/2* expression and in the subsequent EMT,  
216 which we showed is essential for cardiac mesoderm commitment. This blockade must, however,  
217 occur after escape from pluripotency, because the drop in Nanog expression induced by WNT  
218 activation occurred normally. Moreover, *BAK/BAX* double KO iPSCs can still successfully enter  
219 the neural tube lineage<sup>15</sup>. A previous report identified caspase activity as being required for the  
220 differentiation of ESCs in response to retinoic acid<sup>13</sup>. However, the mechanism in this case  
221 appears to be through caspase-induced cleavage and deactivation of Nanog, rather than  
222 through the generation of a soluble paracrine signal. Apoptosis occurs pre-gastrulation during  
223 mouse embryogenesis<sup>16</sup>, but apoptosis-defective mice generally progress through  
224 embryogenesis. *CASP3 /CASP7* double KO mice die perinatally from cardiovascular defects<sup>21</sup>.  
225 A triple KO mouse line lacking BAX, BAK and BOK also develops through embryogenesis<sup>22</sup>.  
226 This observation emphasizes the idea that other types of cell death (such as ferroptosis) might  
227 also occur in embryogenesis to release nucleotides; additionally, nucleotides can be released  
228 through pannexin 1 channels in response to multiple other stresses, which might provide the  
229 necessary signal in embryogenesis<sup>20,23</sup>. Finally, we noted that ATP was insufficient to trigger  
230 100% of the cells to undergo EMT; moreover, the conversion occurs in clusters across the cell  
231 colonies. It is possible that additional metabolites released by apoptosing cells contribute to the  
232 signal, or that the nucleotides are degraded before they can trigger differentiation of the entire  
233 cell population. The patchiness of the response suggests cell-cell communication might promote  
234 the EMT, or that groups of cells are in different initial states that are less or more susceptible to  
235 purinergic signaling.

236 Overall, it is remarkable that the death of a fraction of pluripotent stem cells is required for  
237 differentiation of the survivors, through a paracrine find-me signal that usually functions for  
238 apoptotic cell clearance. It will be of interest to determine if other developmental processes  
239 require similar signaling mechanisms.

240

241

## 242 **Material & Methods**

243

### 244 **Reagents**

245 Common lab reagents are listed in **Table 1**.

246

### 247 **Cell lines and Cell culture**

248 GM25256 hiPSCs were obtained from the Coriell Institute and were derived from a healthy 30-

249 year-old male. mEGFP-TJP1 knock-in GM25256 hiPSC cell line was obtained from the Allen Cell

250 Collection, Coriell Institute (Cell ID AICS-0023 cl.20). *BAX/BAK* double knock-out hiPSC GM25256

251 cell line were obtained from Dr. Vivian Gama (Joshi et al, <https://doi.org/10.1038/s41419-020->

252 03002-x). Human embryonic stem cell line H9 (WA09) was obtained from WiCell Research

253 Institute (Wisconsin). All experiments using hESCs were performed using the WA09 (H9) cell

254 line under the supervision of the Vanderbilt Institutional Human Pluripotent Cell Research

255 Oversight (VIHPCRO) Committee (Protocol IRB # 160146 to VG).

256 hiPSCs and hESCs H9 cell lines were cultured on Matrigel coated 6-well plates (Matrigel diluted

257 at 42 µg/mL in DMEM/F12 media) and grown in mTeSR1 medium. Medium was changed daily

258 until cells reached 70% confluence. Cells were passaged using Gentle cell dissociation reagent

259 for 4 min, resuspended in mTeSR1 as small clusters and replated at 1:7.

260 HEK-293T cells were obtained from ATCC and maintained in Dulbecco's modified Eagle's

261 medium supplemented with 10% fetal bovine serum and passaged at 1:10 every 2-3 d.

262 All cell lines used in this study were maintained at 37 °C and under 5% CO<sub>2</sub>.

263

### 264 **Cell freezing and thawing**

265 hiPSCs and hESCs were collected as previously described and centrifuged at 1000 rpm for 3 min.

266 Pellets were resuspended in mTeSR1 supplemented with 10% DMSO and aliquoted in cryovials.

267 Cells were first transferred at -80 °C for 24h before long-term storage in liquid nitrogen.

268 hiPSCs and hESCs were slowly thawed using mTeSR1 media, centrifuged and resuspended in

269 mTeSR1 supplemented with 10 µM of Y-27632 for 24h.

270

## 271 **Cardiomyocyte differentiation protocol**

272 This protocol was adapted from Lian et al<sup>2,24</sup> (GiWi protocol).

273 Briefly once confluency reached 70-80%, cells were treated with RPMI 1640 supplemented with  
274 1X B27 minus Insulin and 7.5  $\mu$ M CHIR-99021 for 48h. At 48h after CHIR addition, media was  
275 aspirated and replaced with RPMI 1640, supplemented with 1X B27 minus Insulin and 7.5  $\mu$ M of  
276 IWP-2 for 48h. Then, cells were incubated for 48h with RPMI 1640/1X B27 minus Insulin, before  
277 maintaining them in RPMI 1640/1X B27 plus insulin every 3 d. Spontaneous and homogenous  
278 beating should be observed within 10-12 days after the protocol initiation.

279 hiPSC-derived cardiomyocytes (hiPSC-CMs) used in Figure 5G were generated using the small  
280 molecules CHIR-99021 (Selleck Chemicals) and IWR-1 (Sigma). Cardiac differentiation media  
281 were defined as M1 (RPMI 1640 with glucose with B27 minus insulin), M2 (RPMI 1640 minus  
282 glucose with B27 minus insulin), and M3 (RPMI 1640 with glucose with B27). When hiPSCs  
283 reached 60% confluence, cardiac differentiation was initiated (day 0). At d 0, hiPSCs were  
284 supplemented in M1 with 6  $\mu$ M CHIR-99021. On d 2, the media was changed to M1. On d 3,  
285 cells were treated with 5  $\mu$ M IWR-1 in M1. Metabolic selection was started at day 10 and cells  
286 were treated with M2 from d 10 to 16. On d 16, cells were transitioned to M3. Media was  
287 changed every other day until d 30.

288

## 289 **SDS-PAGE and Western blotting**

290 Cells were washed in 1X PBS. Lysates were obtained by scraping cells in lysis buffer (150 mM  
291 NaCl, 10 mM Tris-HCl pH 7.5, 1 mM ethylenediaminetetraacetic acid (EDTA), 1% Triton X-100,  
292 0.1% SDS, 1X protease and phosphatase inhibitors) followed by a 5 min incubation on ice and  
293 centrifugation at 16000 rpm for 10 min at 4°C. Protein concentration was measuring using  
294 Precision Red.

295 30  $\mu$ g of proteins were resolved on bis-tris acrylamide gels and transferred onto nitrocellulose  
296 membrane for 90min at 110V. Membranes were blocked for 30 min in 5% non-fat milk in TBS-T  
297 (10 mM Tris pH 8.0, 150 mM NaCl, 0.5% Tween 20) before overnight incubation with primary  
298 antibodies (**Table 2**) at 4°C with gentle rocking. Membranes were washed in TBS-T and

299 incubated 1h at room temperature with Alexa-Fluor conjugated secondary antibodies (**Table 2**).  
300 Membranes were washed in TBS-T and scanned using the LI-COR Odyssey CLx.  
301 All images were analyzed using Image Studio Lite v. 5.2.5.

302

### 303 **Immunofluorescence**

304 Cells were grown on Matrigel-coated coverslip, fixed with 4% paraformaldehyde for 10 min,  
305 permeabilized (20 mM glycine, 0.05% Triton X-100) for 10 min and blocked with 5% BSA-PBS for  
306 30 min. Primary and secondary antibodies were diluted in blocking buffer and incubated for 1 h  
307 in a dark, humidified chamber. Coverslips were washed three times in PBS before being  
308 mounted on glass slides using Fluoromount-G™ Slide Mounting Medium.

309 Images were taken using an inverted Nikon A1-R confocal microscope equipped with a 40x oil  
310 objective (NA 1.2). 0.5  $\mu$ m Z-stack covering the entire cell height were obtained.

311 Super-resolution images for Figure 5G were acquired using a Nikon SIM microscope equipped  
312 with a 1.49 NA 100x Oil objective an Andor DU-897 EMCCD camera.

313 Images were processed and analyzed using Fiji software (ImageJ version 2.1.0/1.53c).

314

### 315 **Live Cell Imaging**

316 mEGFP-TJP1 hiPSCs were plated on Matrigel-coated MaTek 35mm dishes. Cells were imaged  
317 every 10-15 min on a Nikon A1-R with a 40X oil objective (NA 1.2) and equipped with a heated  
318 CO2 chamber. 2-3  $\mu$ m Z-stack were obtained and images were processed and analyzed using Fiji  
319 software (ImageJ version 2.1.0/1.53c).

320

### 321 **Generation of knock-out cell lines.**

322 Single-guide RNA was selected using ChopChop<sup>25</sup> and Benchling design tools and are listed in  
323 **Table 3**. Annealed oligonucleotides were cloned into pLentiCrispRv2-Puro as described by  
324 Sanjana et al (10.1038/nmeth.3047). HEK-293T cells were seeded on 15 cm dish to 50%  
325 confluence and transfected using calcium phosphate. Briefly, 50  $\mu$ g of the lentiviral plasmid,  
326 37.5  $\mu$ g of pSPAX2 (Addgene 8454) and 15  $\mu$ g of pMD2G (Addgene 12260) were combined to  
327 1125  $\mu$ l of sterile water, complemented with 125  $\mu$ l of 2.5M CaCl<sub>2</sub>. While vortexing, 1.25 ml of



328 filter sterilized 2× HEPES-buffered saline (50 mM Hepes, 10 mM KCl, 12 mM Dextrose, 280 mM  
329 NaCl, 1.5 mM Na<sub>2</sub>PO<sub>4</sub>, pH 7.04) was added, and the solution was incubated 5 min at RT before  
330 adding to HEK-293T cells. Medium was removed after 6-8 h and replaced with 15 ml of 10% FBS  
331 DMEM. Lentiviruses were collected after 48h, concentrated using Amicon centrifugal filter units  
332 (100 kDa cut-off) and stored at -80°C. hiPSCs were transduced in suspension for 24h and then  
333 selected using 1 µg/mL Puromycin.

334

### 335 **RNA isolation and RT-qPCR**

336 RNA was isolated using RNeasy Mini kit. 1 µg of RNA was reverse transcribed to cDNA using  
337 SuperScript III First-Strand Synthesis System and diluted 1:10 in water. 4.5 µL of cDNA was  
338 mixed with 7.5 µL Maxima SYBR Green/Fluorescein Master Mix and 3 µL of primers (1 mM  
339 each) (**Table 4**). qPCR was performed on a BioRad CFX96 Thermocycler and Ct values from  
340 technical triplicates were average and used to calculate the relative gene expression normalized  
341 to GAPDH, using the  $\Delta\Delta C_t$  formula.

342

### 343 **Annexin V-APC assay**

344 Protocol was adapted from the Annexin V apoptosis kit APC. Briefly, cells were collected as  
345 single cell suspension by incubation in gentle cell dissociation buffer for 8 min at 37°C. Pellet  
346 was washed in once in PBS and once in 1X binding buffer. Cells were resuspended in 100 µL 1X  
347 binding buffer and incubated 15 min at room temperature with 5 µL of Annexin-APC. Cells were  
348 washed in 1X binding buffer, resuspended in 200 µL of binding buffer and incubated with 5 µL  
349 of propidium iodide. Cells were passed through a 70 µm strainer prior to cytometry analysis  
350 using a 3-laser Fortessa flow cytometer.

351

### 352 **ATP release - Luciferase assay**

353 hiPSCs were treated with CHIR-99021 as described previously plus DMSO or 10 µM Q-VD-OPH.  
354 Aliquots of culture medium (300 µl) were taken at indicated timepoints and mixed with 100 µL  
355 of 4X RealTime-Glo extracellular ATP assay reagent (Promega) reconstituted in RPMI  
356 1640/B27(-Ins) medium. Technical triplicates of 100 µL were dispensed into a dark edged glass-

357 bottom 96-well plate. Luminescence was measured after 30min using a HT-Synergy plate  
358 reader. Luminescence was subtracted for background.  
359 A standard curve was obtained by serial dilution of ATP in RPMI 1640/B27(-Ins) media followed  
360 by the luciferase assay as described above. Simple linear regression was applied to transform  
361 luminescence values to ATP concentration.

362

### 363 **Statistical analysis**

364 Datasets were analyzed using Prism8 (v.8.4.3) and tested for normality prior to applying the  
365 appropriate statistical test, as mentioned in each figure legend. Error bars represent S.D unless  
366 stated otherwise. Significance levels are given as follows: n.s. (not significant) :  $P > 0.05$ , \* $P \leq$   
367  $0.05$ , \*\* $P \leq 0.01$ , \*\*\* $P \leq 0.001$ , \*\*\*\* $P \leq 0.0001$ .

368 All experiments were repeated at least three times independently as biological repeats unless  
369 stated otherwise.

370 Datasets are color-coded to reflect the variability between biological repeats.

371

### 372 **Acknowledgments**

373 We thank Piyush Joshi for establishing the BAX/BAK DKO hiPSCs and Megan Rasmussen for the  
374 providing the SIM pictures of hiPSC-derived cardiomyocytes. We thank members of the Macara  
375 lab for discussion. This work was supported by GM070902 from NIGMS, CA197571 from the NCI  
376 (both to I.G.M) and by 1R35GM128915-01 (to V.G.).

377

### 378 **Contributions**

379 Conceptualization, L.F., V.G. and I.G.M. ; Methodology, L.F., I.G.M. ; L.F. performed experiments  
380 and analyzed data. V.G. provided resources. L.F. prepared the figures. I.G.M and LF. wrote and  
381 edited the manuscript. I.G.M. supervised the work.

382

### 383 **Declaration of interests**

384 The authors declare no competing interests.

385

386

387 **References**

388

- 389 1 Ueno, S. *et al.* Biphasic role for Wnt/beta-catenin signaling in cardiac specification in  
390 zebrafish and embryonic stem cells. *Proc Natl Acad Sci U S A* **104**, 9685-9690,  
391 doi:10.1073/pnas.0702859104 (2007).
- 392 2 Lian, X. *et al.* Robust cardiomyocyte differentiation from human pluripotent stem cells  
393 via temporal modulation of canonical Wnt signaling. *Proc Natl Acad Sci U S A* **109**,  
394 E1848-1857, doi:10.1073/pnas.1200250109 (2012).
- 395 3 Rao, J. *et al.* Stepwise Clearance of Repressive Roadblocks Drives Cardiac Induction in  
396 Human ESCs. *Cell Stem Cell* **18**, 554-556, doi:10.1016/j.stem.2016.03.008 (2016).
- 397 4 Loh, K. M. *et al.* Mapping the Pairwise Choices Leading from Pluripotency to Human  
398 Bone, Heart, and Other Mesoderm Cell Types. *Cell* **166**, 451-467,  
399 doi:10.1016/j.cell.2016.06.011 (2016).
- 400 5 Bedzhov, I. *et al.* Adhesion, but not a specific cadherin code, is indispensable for ES cell  
401 and induced pluripotency. *Stem Cell Res* **11**, 1250-1263, doi:10.1016/j.scr.2013.08.009  
402 (2013).
- 403 6 Takahashi, K. & Yamanaka, S. Induction of pluripotent stem cells from mouse embryonic  
404 and adult fibroblast cultures by defined factors. *Cell* **126**, 663-676,  
405 doi:10.1016/j.cell.2006.07.024 (2006).
- 406 7 Liu, X. *et al.* Sequential introduction of reprogramming factors reveals a time-sensitive  
407 requirement for individual factors and a sequential EMT-MET mechanism for optimal  
408 reprogramming. *Nat Cell Biol* **15**, 829-838, doi:10.1038/ncb2765 (2013).
- 409 8 Li, R. *et al.* A mesenchymal-to-epithelial transition initiates and is required for the  
410 nuclear reprogramming of mouse fibroblasts. *Cell Stem Cell* **7**, 51-63,  
411 doi:10.1016/j.stem.2010.04.014 (2010).
- 412 9 Samavarchi-Tehrani, P. *et al.* Functional genomics reveals a BMP-driven mesenchymal-  
413 to-epithelial transition in the initiation of somatic cell reprogramming. *Cell Stem Cell* **7**,  
414 64-77, doi:10.1016/j.stem.2010.04.015 (2010).
- 415 10 Nowotschin, S. & Hadjantonakis, A. K. Guts and gastrulation: Emergence and  
416 convergence of endoderm in the mouse embryo. *Curr Top Dev Biol* **136**, 429-454,  
417 doi:10.1016/bs.ctdb.2019.11.012 (2020).
- 418 11 D'Amour, K. A. *et al.* Efficient differentiation of human embryonic stem cells to definitive  
419 endoderm. *Nat Biotechnol* **23**, 1534-1541, doi:10.1038/nbt1163 (2005).
- 420 12 Li, Q. *et al.* A sequential EMT-MET mechanism drives the differentiation of human  
421 embryonic stem cells towards hepatocytes. *Nat Commun* **8**, 15166,  
422 doi:10.1038/ncomms15166 (2017).
- 423 13 Fujita, J. *et al.* Caspase activity mediates the differentiation of embryonic stem cells. *Cell*  
424 *Stem Cell* **2**, 595-601, doi:10.1016/j.stem.2008.04.001 (2008).
- 425 14 Bondue, A. *et al.* Defining the earliest step of cardiovascular progenitor specification  
426 during embryonic stem cell differentiation. *J Cell Biol* **192**, 751-765,  
427 doi:10.1083/jcb.201007063 (2011).

- 428 15 Joshi, P. *et al.* Modeling the function of BAX and BAK in early human brain development  
429 using iPSC-derived systems. *Cell Death Dis* **11**, 808, doi:10.1038/s41419-020-03002-x  
430 (2020).
- 431 16 Manova, K. *et al.* Apoptosis in mouse embryos: elevated levels in pregastrulae and in the  
432 distal anterior region of gastrulae of normal and mutant mice. *Dev Dyn* **213**, 293-308,  
433 doi:10.1002/(SICI)1097-0177(199811)213:3<293::AID-AJA6>3.0.CO;2-D (1998).
- 434 17 Ravichandran, K. S. Beginnings of a good apoptotic meal: the find-me and eat-me  
435 signaling pathways. *Immunity* **35**, 445-455, doi:10.1016/j.immuni.2011.09.004 (2011).
- 436 18 Lauber, K., Blumenthal, S. G., Waibel, M. & Wesselborg, S. Clearance of apoptotic cells:  
437 getting rid of the corpses. *Mol Cell* **14**, 277-287, doi:10.1016/s1097-2765(04)00237-0  
438 (2004).
- 439 19 Elliott, M. R. *et al.* Nucleotides released by apoptotic cells act as a find-me signal to  
440 promote phagocytic clearance. *Nature* **461**, 282-286, doi:10.1038/nature08296 (2009).
- 441 20 Erb, L. & Weisman, G. A. Coupling of P2Y receptors to G proteins and other signaling  
442 pathways. *Wiley Interdiscip Rev Membr Transp Signal* **1**, 789-803, doi:10.1002/wmts.62  
443 (2012).
- 444 21 Lakhani, S. A. *et al.* Caspases 3 and 7: key mediators of mitochondrial events of  
445 apoptosis. *Science* **311**, 847-851, doi:10.1126/science.1115035 (2006).
- 446 22 Ke, F. F. S. *et al.* Embryogenesis and Adult Life in the Absence of Intrinsic Apoptosis  
447 Effectors BAX, BAK, and BOK. *Cell* **173**, 1217-1230 e1217, doi:10.1016/j.cell.2018.04.036  
448 (2018).
- 449 23 Bao, L., Locovei, S. & Dahl, G. Pannexin membrane channels are mechanosensitive  
450 conduits for ATP. *FEBS Lett* **572**, 65-68, doi:10.1016/j.febslet.2004.07.009 (2004).
- 451 24 Lian, X. *et al.* Directed cardiomyocyte differentiation from human pluripotent stem cells  
452 by modulating Wnt/beta-catenin signaling under fully defined conditions. *Nat Protoc* **8**,  
453 162-175, doi:10.1038/nprot.2012.150 (2013).
- 454 25 Labun, K. *et al.* CHOPCHOP v3: expanding the CRISPR web toolbox beyond genome  
455 editing. *Nucleic Acids Res* **47**, W171-W174, doi:10.1093/nar/gkz365 (2019).
- 456



**Figure 1**

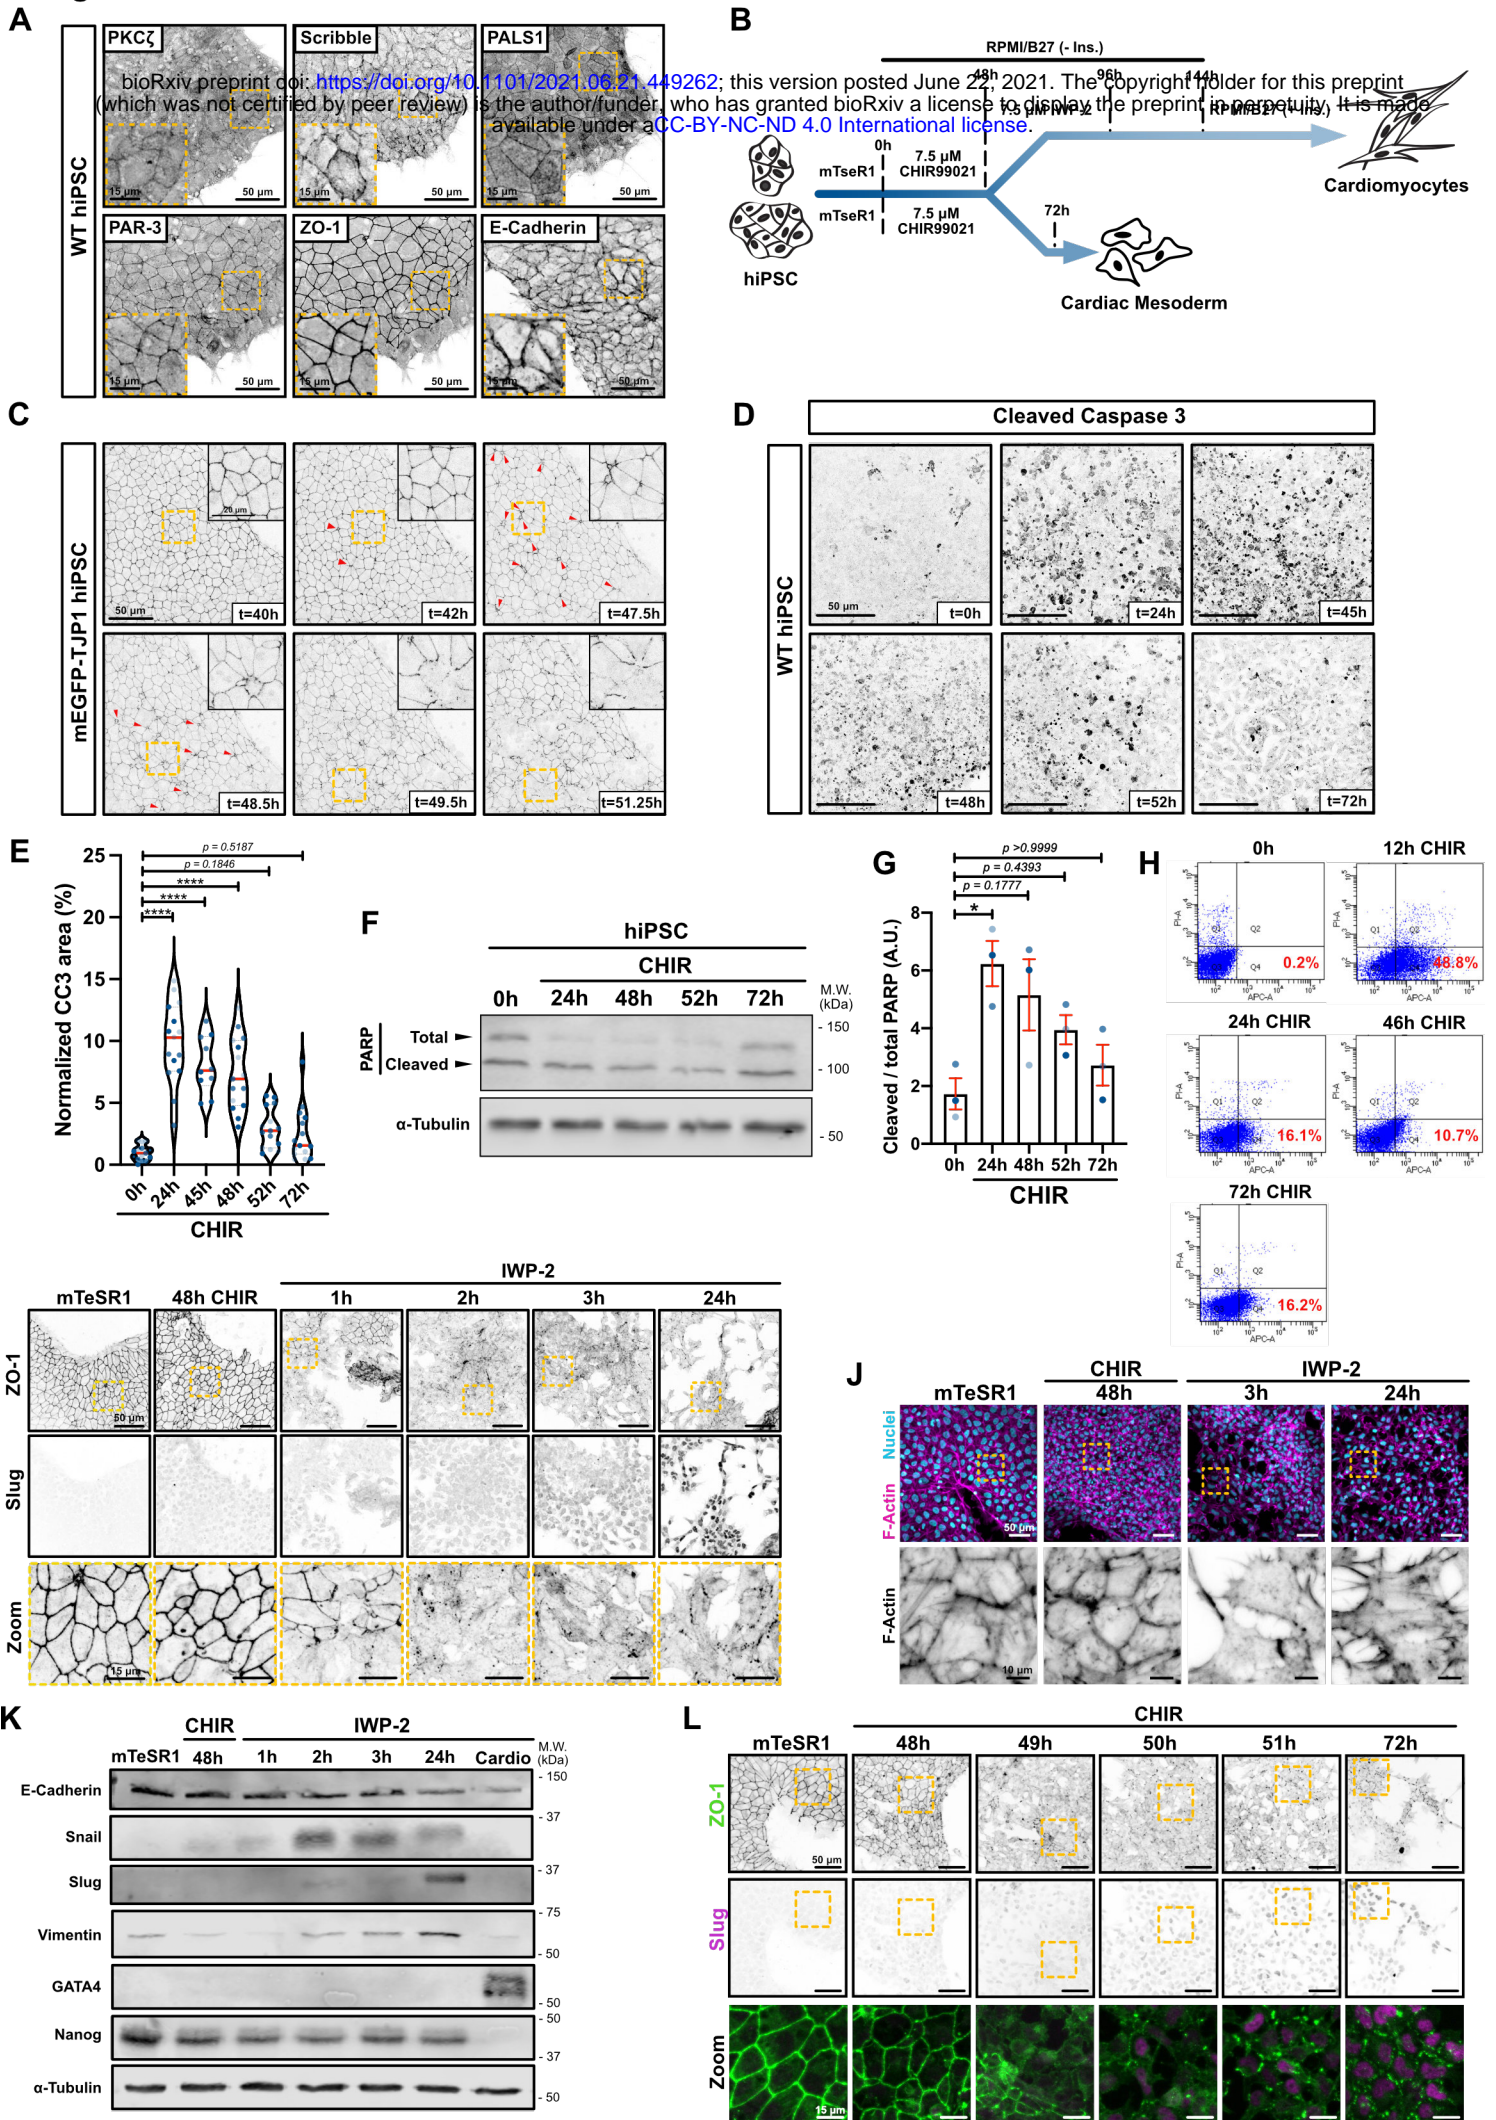

## Figure 1

A) Immunofluorescence of hiPSC GM25256 stained for epithelial/polarity markers (Tight junctions: ZO-1 ; Adherent junctions: E-Cadherin ; Baso-lateral marker: Scribble ; Apical PAR complex: PKC $\zeta$ , PAR-3 ; Apical Crumbs complex: PALS1). Maximum intensity projections are shown. Scale bar = 50  $\mu$ m. Inset represents a magnified area (yellow dotted square). Scale bar = 15  $\mu$ m.

B) Schematic of GiWi differentiation protocol (top path) (conversion of hiPSC into cardiomyocytes); or alternative cardiac mesoderm with a prolonged incubation in CHIR-99021 (bottom path).

C) Stills from Supp. Movie 1. mEGFP-TJP1 knock-in hiPSCs were imaged from 40h after CHIR treatment. Red arrows represent extruding cells. Scale bar = 50  $\mu$ m. Magnified area (yellow dotted square) is shown on the right-hand corner. Scale bar = 20  $\mu$ m.

D-E) Representative immunofluorescence images of wildtype hiPSCs fixed at the indicated times after CHIR addition and stained for cleaved Caspase-3. Maximum intensity projections are shown. Scale bar = 50  $\mu$ m (D). Violin plots quantifying the area of cleaved caspase 3-positive cells normalized to the cellular area. Independent biological repeats are color-coded (n=3, 5 random fields of view/repeat). (Median: plain red line – Quartiles: black dotted lines). Tukey's multiple comparison was applied (\*\*\*\*  $P \leq 0.0001$ ) (E).

F-G) Immunoblot of PARP cleavage in hiPSCs during CHIR treatment. Molecular weights (M.W.) are indicated in kDa (F). PARP cleavage was quantified by densitometry across 3 independent biological repeats (color-coded). Dunn's multiple comparison was applied (\*  $p < 0.05$ ) (G).

H) Cytometry gates from an Annexin-APC assay. Cells were treated with CHIR for different times, collected, stained and analyzed for Annexin (x-axis) and PI (y-axis). Percentage of Annexin-positive/PI-negative (Gate Q4 – Early apoptosis) is reported for each condition.

I) Representative immunofluorescence images of hiPSCs (mTeSR1) or cells undergoing differentiation using CHIR/IWP-2 protocol, and stained for ZO-1 and Slug. Maximum intensity projections are shown. Scale bar = 50  $\mu$ m. Magnified areas of the ZO-1 staining (yellow dotted square) are shown in the bottom row. Scale bar = 15  $\mu$ m.



J) Representative immunofluorescence images of wildtype hiPSCs fixed at the indicated times along the differentiation protocol and stained for F-actin (Phalloidin – Magenta) and nuclei (Dapi). Maximum intensity projections are shown. Scale bar = 50  $\mu$ m. Magnified area of the F-actin channel (yellow dotted square) is shown. Scale bar = 10  $\mu$ m.

K) Immunoblots for EMT markers (E-Cadherin, Snail, Slug, Vimentin) during hiPSC differentiation to early cardiac mesoderm. Membranes were also blotted for GATA4 (cardiac specific marker) and Nanog (pluripotency marker). Molecular weights (M.W.) are indicated in kDa.

L) Representative immunofluorescence images of hiPSCs (mTeSR1) or undergoing differentiation using prolonged CHIR incubation, and stained for ZO-1 and Slug. Maximum intensity projections are shown. Scale bar = 50  $\mu$ m. Magnified area (yellow dotted square) is shown as a merge. Scale bar = 15  $\mu$ m.

**Figure 2**

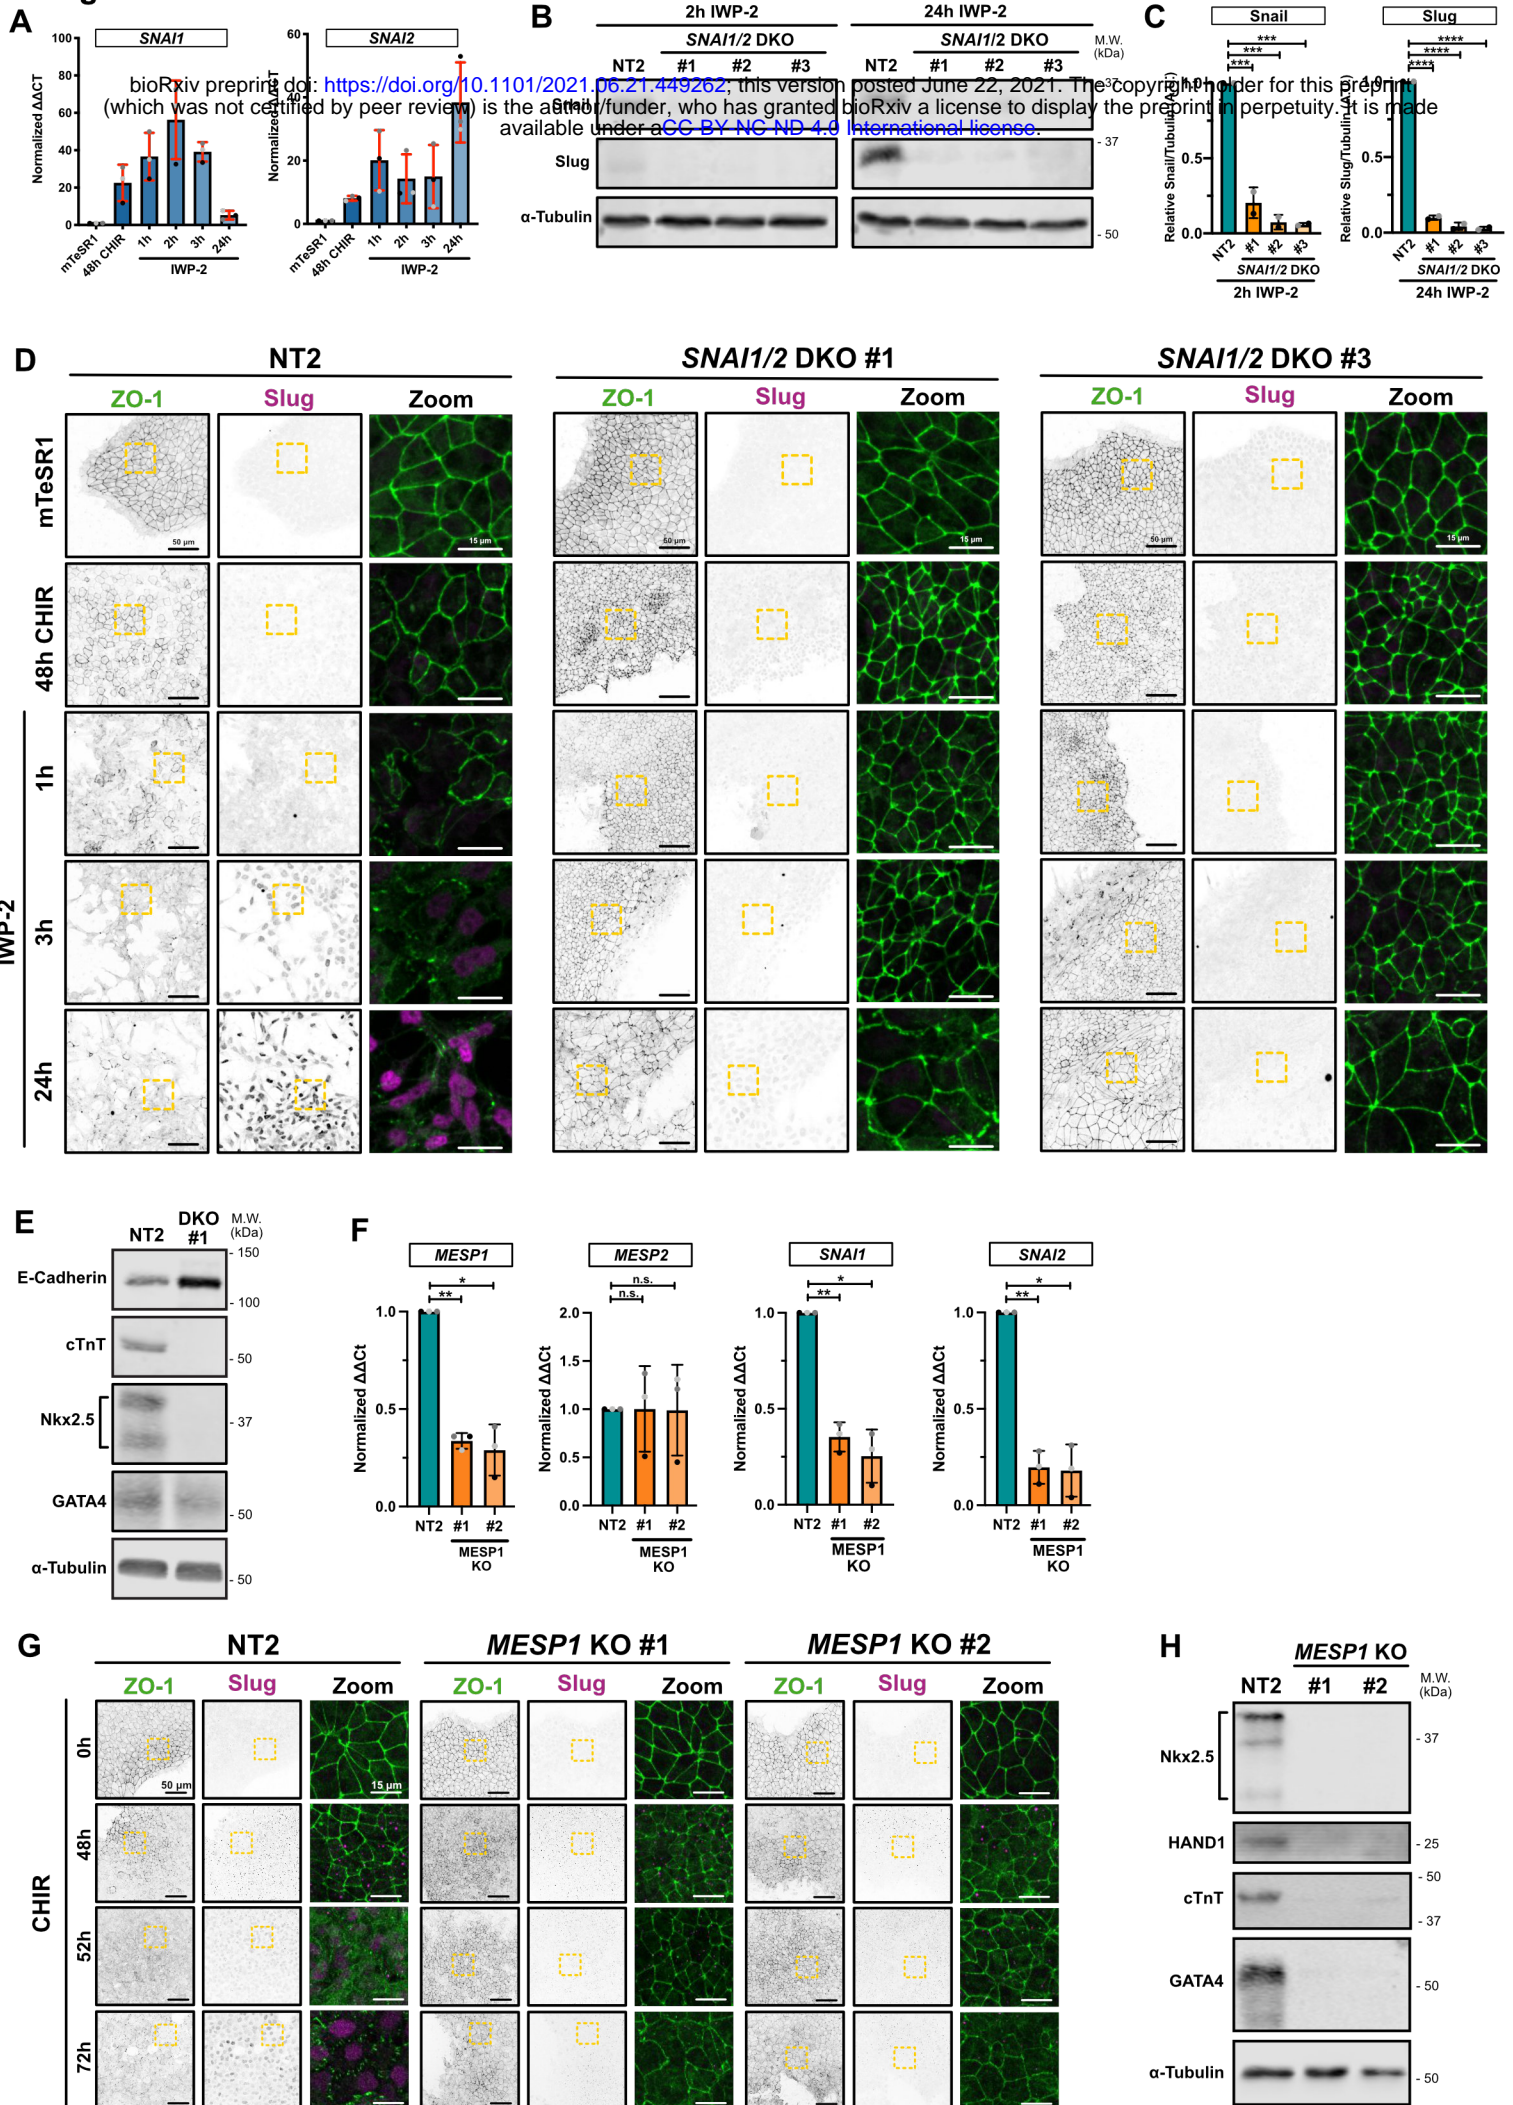

## Figure 2

A) qRT-PCR showing expression of *SNAI1* (Snail) and *SNAI2* (Slug) during differentiation.

Independent biological repeats are color-coded (n=3). Error bar = Mean +/- S.D.

B-C) Immunoblot analysis of three independent *SNAI1/SNAI2* double knockout (DKO) hiPSC cell lines (non-clonal). Lysates from Non-targeting (NT2) or DKO cell lines were collected 2h after IWP-2 treatment (to confirm *SNAI1* knockout – Left panel) or 24h after IWP-2 treatment (to confirm *SNAI2* knockout – Right panel). Molecular weights (M.W.) are indicated in kDa (B).

Expression levels of 2 independent biological replicates were quantified by densitometry and normalized to NT2. Error bar = Mean +/- S.D. Dunnett's multiple comparison test was applied (\*\*\*)  $p \leq 0.001$ , \*\*\*\*  $p \leq 0.0001$  (C).

D) Representative immunofluorescence images of control NT2 and two independent *SNAI1/SNAI2* DKO cultures, fixed at different timepoints post-induction of cardiac mesoderm induction and stained for ZO-1 (green) and Slug (Magenta). Maximum intensity projections are shown. Scale bar = 50  $\mu\text{m}$ . Magnified area (yellow dotted square) is shown. Scale bar = 15  $\mu\text{m}$ .

E) Immunoblot of control NT2 and *SNAI1/SNAI2* DKO #1 hiPSC-derived cardiomyocytes, at 12 days post induction. Expression of EMT marker (E-Cadherin), cardiac lineage markers (cardiac Troponin T, Nkx-2.5, GATA-4) and alpha-Tubulin as loading control were analyzed. Molecular weights (M.W.) are indicated in kDa.

F) Relative gene expression of *MESP1*, *MESP2*, *SNAI1* and *SNAI2* obtained from control (NT2) or two independent *MESP1* knockout (#1 and #2) were analyzed by qRT-PCR.  $\Delta\Delta\text{Ct}$  values from RT-PCR were normalized to NT2. Independent biological repeats are color-coded (n=3). Error bar = Mean +/- S.D. Tukey's multiple comparison test was applied (n.s.  $p > 0.05$ , \*  $p \leq 0.05$ , \*\*  $p \leq 0.01$ ).

G) Representative immunofluorescence images of control NT2 and two independent *MESP1* KO (#1 and #2) non-clonal cell lines, fixed at indicated time, and stained for ZO-1 (green) and Slug (Magenta). Maximum intensity projections are shown. Scale bar = 50  $\mu\text{m}$ . Magnified area (yellow dotted square) is shown as a merge. Scale bar = 15  $\mu\text{m}$ .

H) Immunoblot of control NT2 and *MESP1* KO #1 and #2 hiPSC-derived cardiomyocytes, at 12 days post induction. Expression of cardiac lineage markers (cardiac Troponin T, Nkx-2.5, GATA-

4, HAND1) and  $\alpha$ -Tubulin as loading control were analyzed. Molecular weights (M.W.) are indicated in kDa.



**Figure 3**

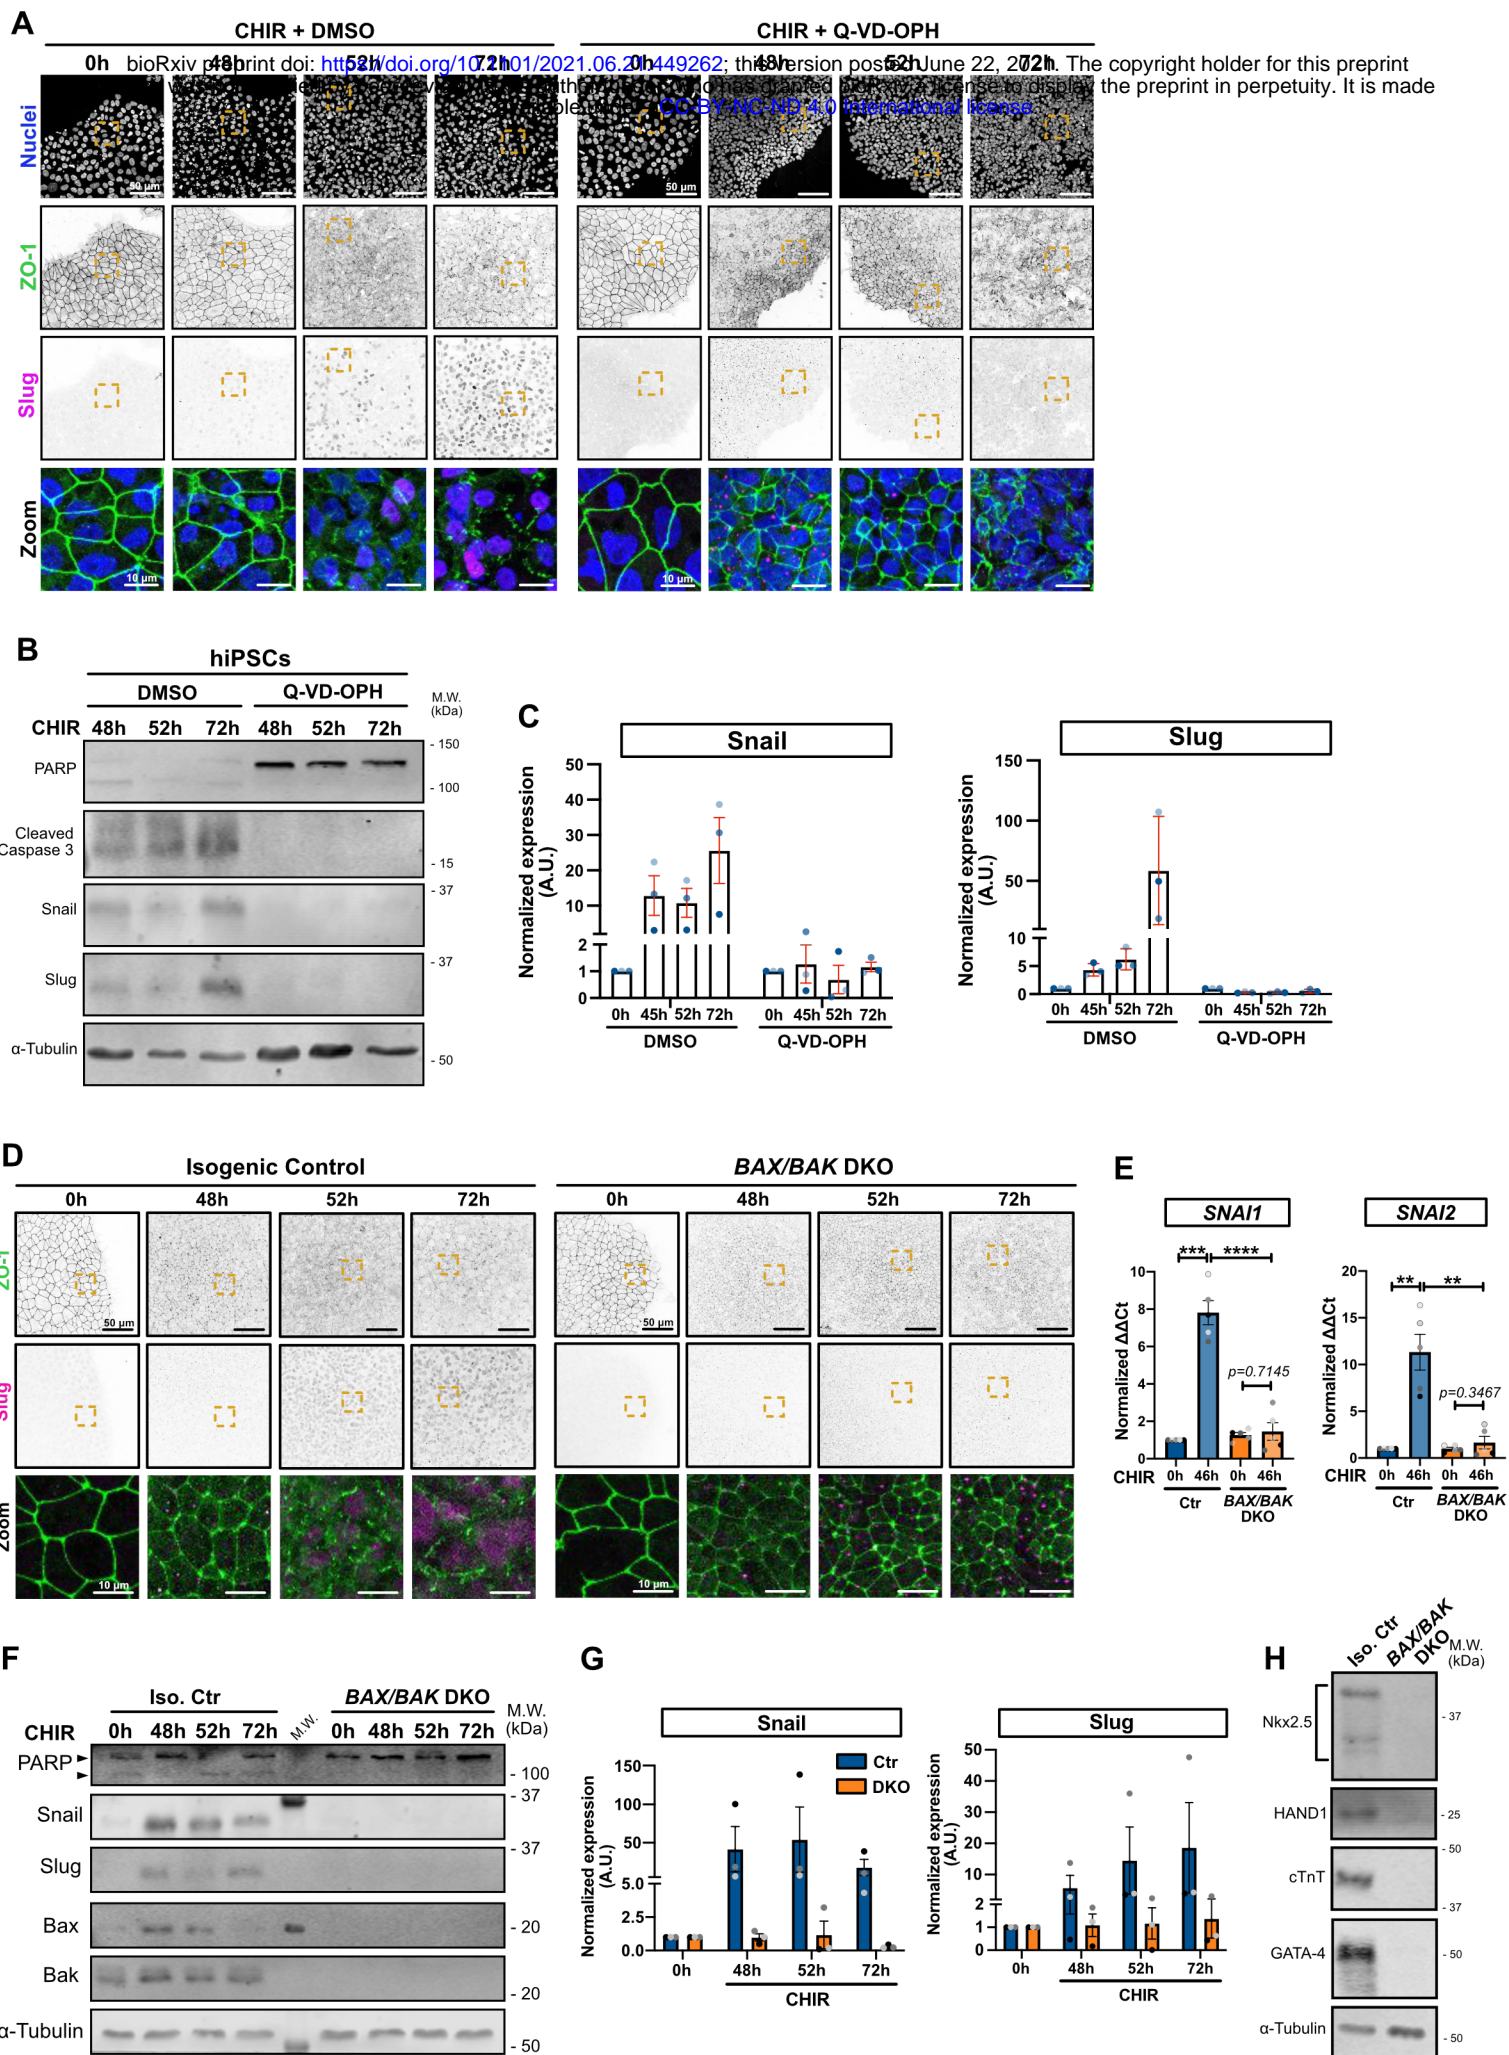

### Figure 3

A) Representative immunofluorescence images of hiPSCs co-treated with CHIR and DMSO (left) or CHIR and 10  $\mu$ M Q-VD-OPH (right) stained for ZO-1 (green) and Slug (magenta) and nuclei (blue). Maximum intensity projections are shown. Scale bar = 50  $\mu$ m. Magnified area (yellow dotted square) is shown as a merge. Scale bar = 10  $\mu$ m.

B-C) Immunoblot analysis of hiPSCs co-treated with CHIR plus DMSO or 10  $\mu$ M Q-VD-OPH. Molecular weights (M.W.) are indicated in kDa (B). Normalized expression of Snail and Slug was quantified by densitometry across 3 independent biological replicates (color-coded). Mean  $\pm$  S.E.M. (C).

D) Representative immunofluorescence images of isogenic control and *BAX/BAK* double knock-out (DKO) hiPSCs, treated with CHIR and stained for ZO-1 (green) and Slug (magenta). Maximum intensity projections are shown. Scale bar = 50  $\mu$ m. Magnified area (yellow dotted square) is shown as a merge. Scale bar = 15  $\mu$ m.

E) Relative gene expression of *SNAI1* and *SNAI2* obtained from isogenic control (Ctr) or *BAX/BAK* DKO hiPSCs, induced or not with CHIR for 46h and analyzed by qRT-PCR.  $\Delta\Delta$ Ct values were normalized to un-induced control cells. Independent biological repeats are color-coded (n=5). Error bar = Mean  $\pm$  S.E.M. Paired t-test was applied to compare 0h vs 46h and unpaired t-test was applied to compare Ctr vs DKO (\*\*  $p \leq 0.01$ , \*\*\*  $p \leq 0.001$ , \*\*\*\*  $p \leq 0.0001$ ).

F-G) Immunoblot analysis of isogenic control (Iso. Ctr) and *BAX/BAK* DKO hiPSCs, treated with CHIR. Molecular weights (M.W.) are indicated in kDa (F). Normalized expression of Snail and Slug was quantified by densitometry across 3 independent biological replicates (color-coded). Mean  $\pm$  S.E.M. (G).

H) Immunoblot of isogenic control (Iso. Ctr) and *BAX/BAK* DKO hiPSC-derived cardiomyocytes, at 12 d post induction. Expression of cardiac lineage markers (cardiac Troponin T, Nkx-2.5, GATA-4, HAND1) and  $\alpha$ -Tubulin as loading control were analyzed.



**Figure 4**

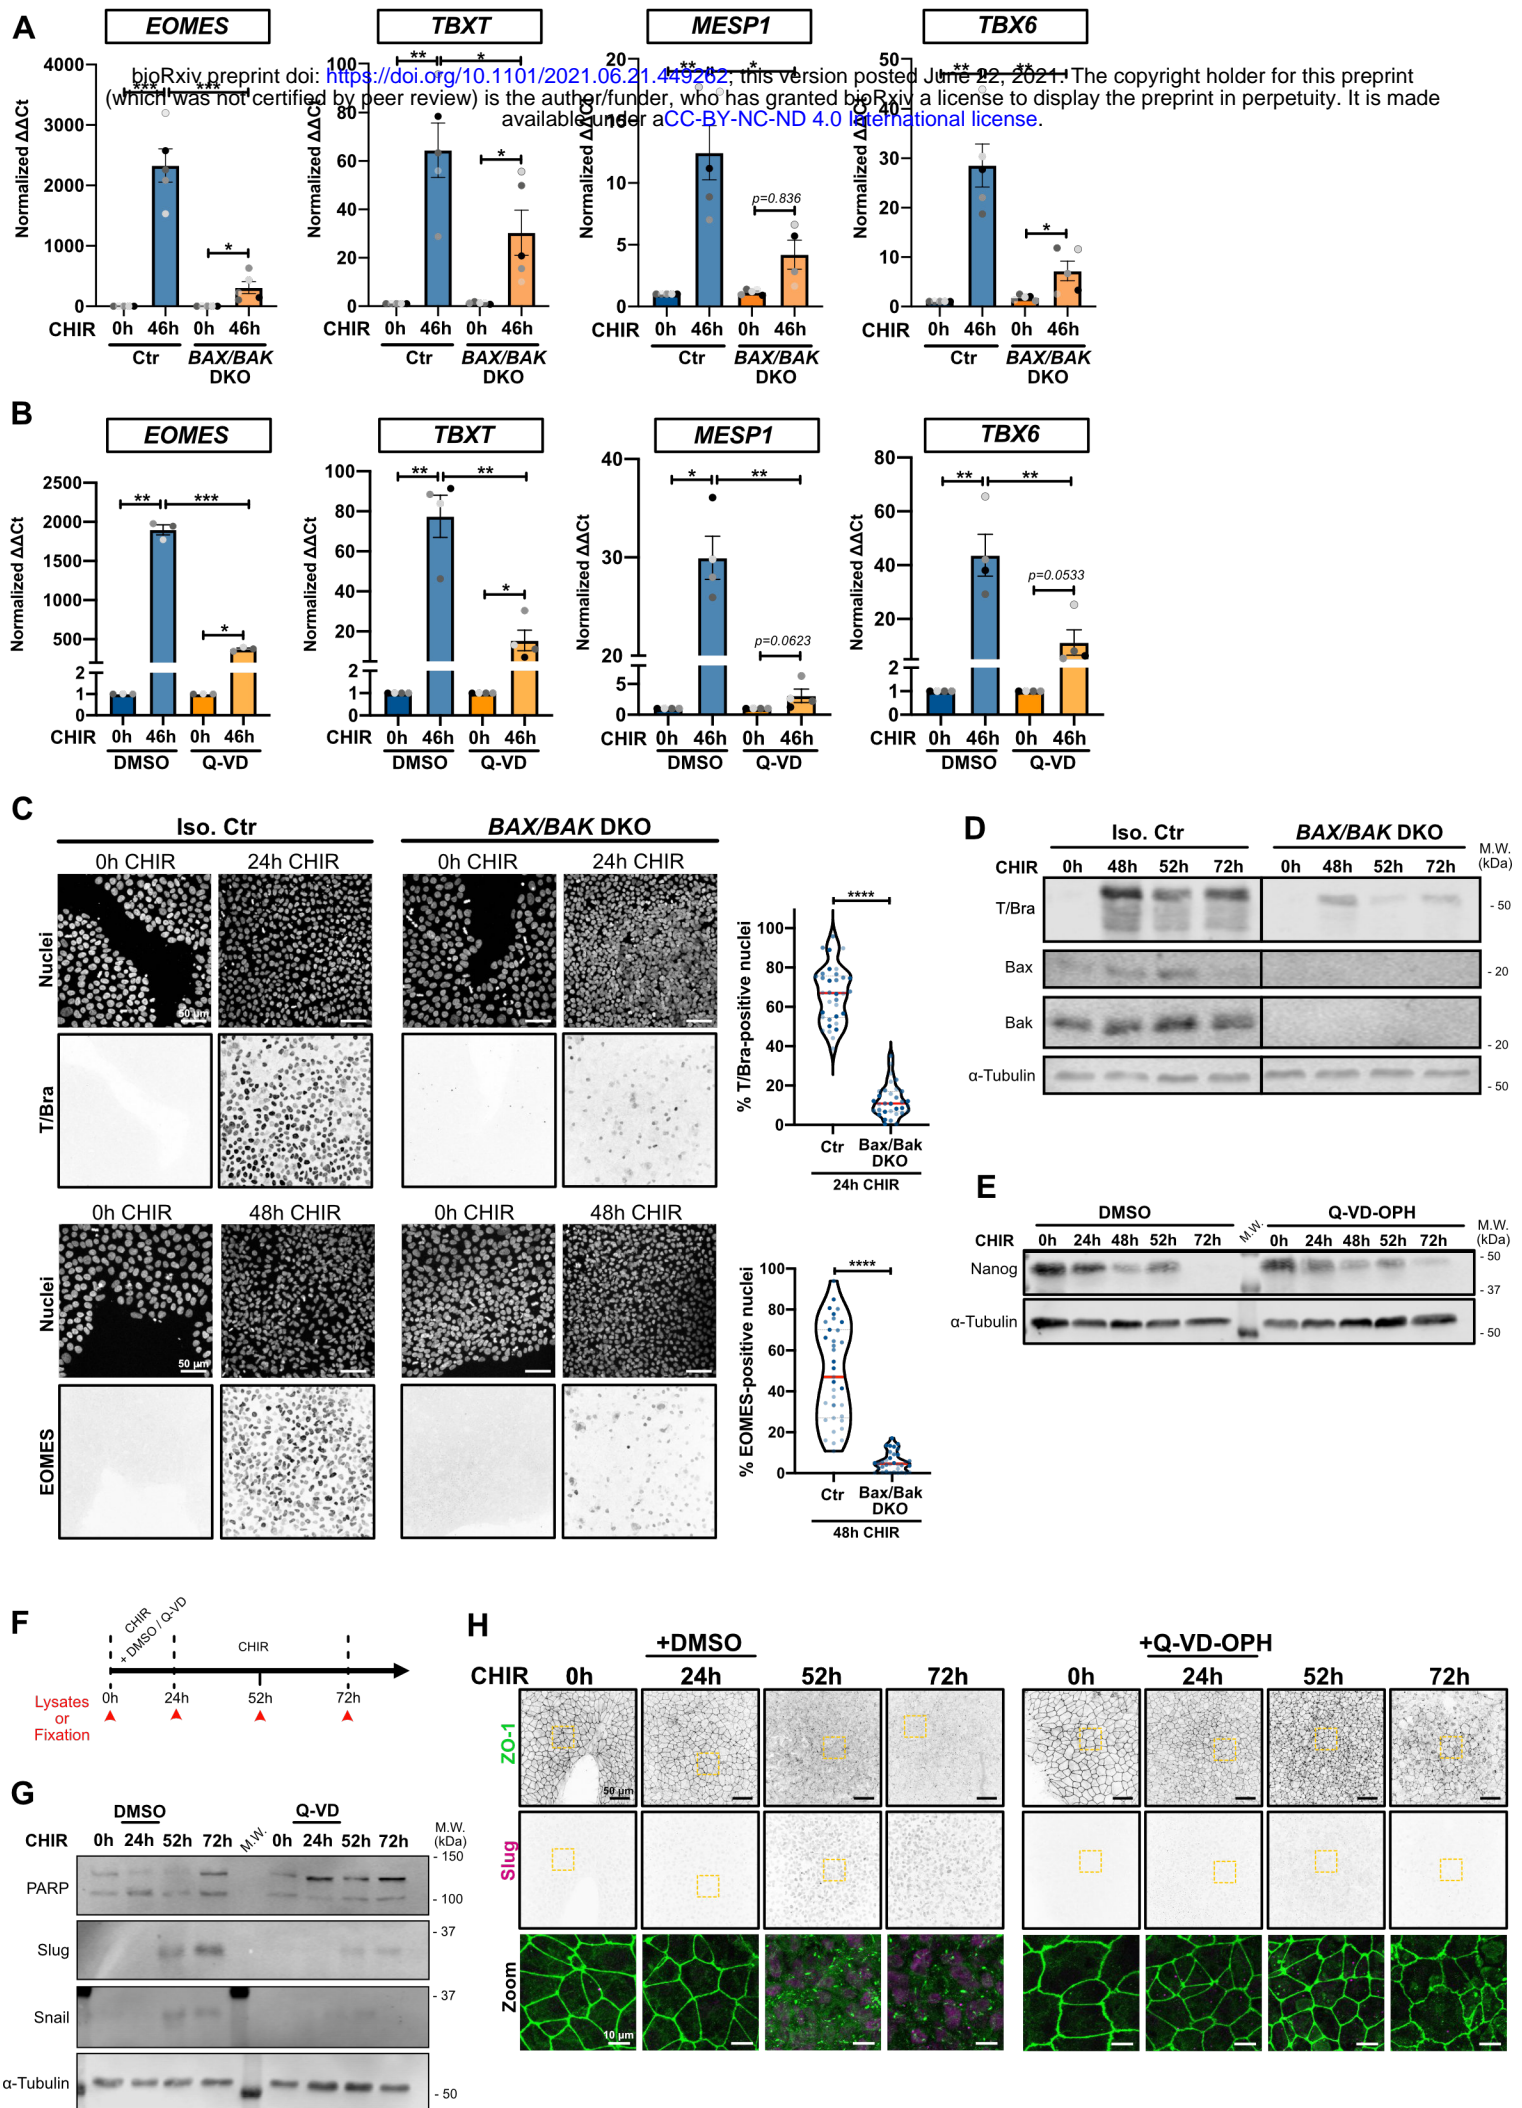

#### Figure 4

A) Relative gene expression of *EOMES*, *TBXT*, *MESP1*, *TBX6* obtained from isogenic control (Ctr) or *BAX/BAK* DKO hiPSCs, induced or not with CHIR for 46h and analyzed by qRT-PCR.  $\Delta\Delta Ct$  values were normalized to un-induced cells. Independent biological repeats are color-coded (n=5). Error bar = Mean +/- S.E.M. Paired t-test was applied to compare 0h vs 46h and unpaired t-test was applied to compare Ctr vs DKO (\*  $p \leq 0.05$ , \*\*  $p \leq 0.01$ , \*\*\*  $p \leq 0.001$ ).

B) Relative gene expression of *EOMES*, *TBXT*, *MESP1*, *TBX6* obtained from WT hiPSCs, induced or not with CHIR and DMSO or CHIR and Q-VD-OPH for 48h and analyzed by qRT-PCR.  $\Delta\Delta Ct$  values were normalized to un-induced cells. Independent biological repeats are color-coded (n=3-4). Error bar = Mean +/- S.E.M. Paired t-test was applied to compare 0h vs 48h and unpaired t-test was applied to compare DMSO vs Q-VD (\*  $p \leq 0.05$ , \*\*  $p \leq 0.01$ , \*\*\*  $p \leq 0.001$ ).

C) Representative immunofluorescence images of isogenic control (Iso. Ctr) and *BAX/BAK* DKO hiPSCs stained for T/Bra (top) and *EOMES* (bottom) and nuclei, before (0h) and after CHIR treatment. Maximum intensity projections are shown. Scale bar = 50  $\mu\text{m}$ . Violin plots summarize quantification of the percentage of T/Bra-positive (top) and *EOMES*-positive (bottom) nuclei after CHIR treatment (Median: plain red line – Quartiles: black dotted lines). Independent biological repeats are color-coded (n=3, 10-12 random fields of view/repeat). Mann-Whitney test was applied (\*\*\*\*  $p \leq 0.001$ ).

D) Immunoblot of isogenic control (Iso. Ctr) and *BAX/BAK* DKO hiPSCs analyzing T/Bra expression following CHIR addition. Molecular weights (M.W.) are indicated in kDa.

E) Immunoblot of WT iPSC treated with CHIR +/- 10  $\mu\text{M}$  Q-VD-OPH and analyzed for Nanog expression. Molecular weights (M.W.) are indicated in kDa.

F) Treatment schedule is indicated and timepoints for lysate collection and fixation is depicted by red arrows.

G-H) Immunoblot analysis (G) and representative immunofluorescence images (H) of hiPSCs treated with CHIR +/- 10  $\mu\text{M}$  Q-VD-OPH for 24h, then Q-VD-OPH was washed out and cells were incubated for another 28h or 48h with CHIR (respectively 52h and 72h timepoint).

**Figure 5**

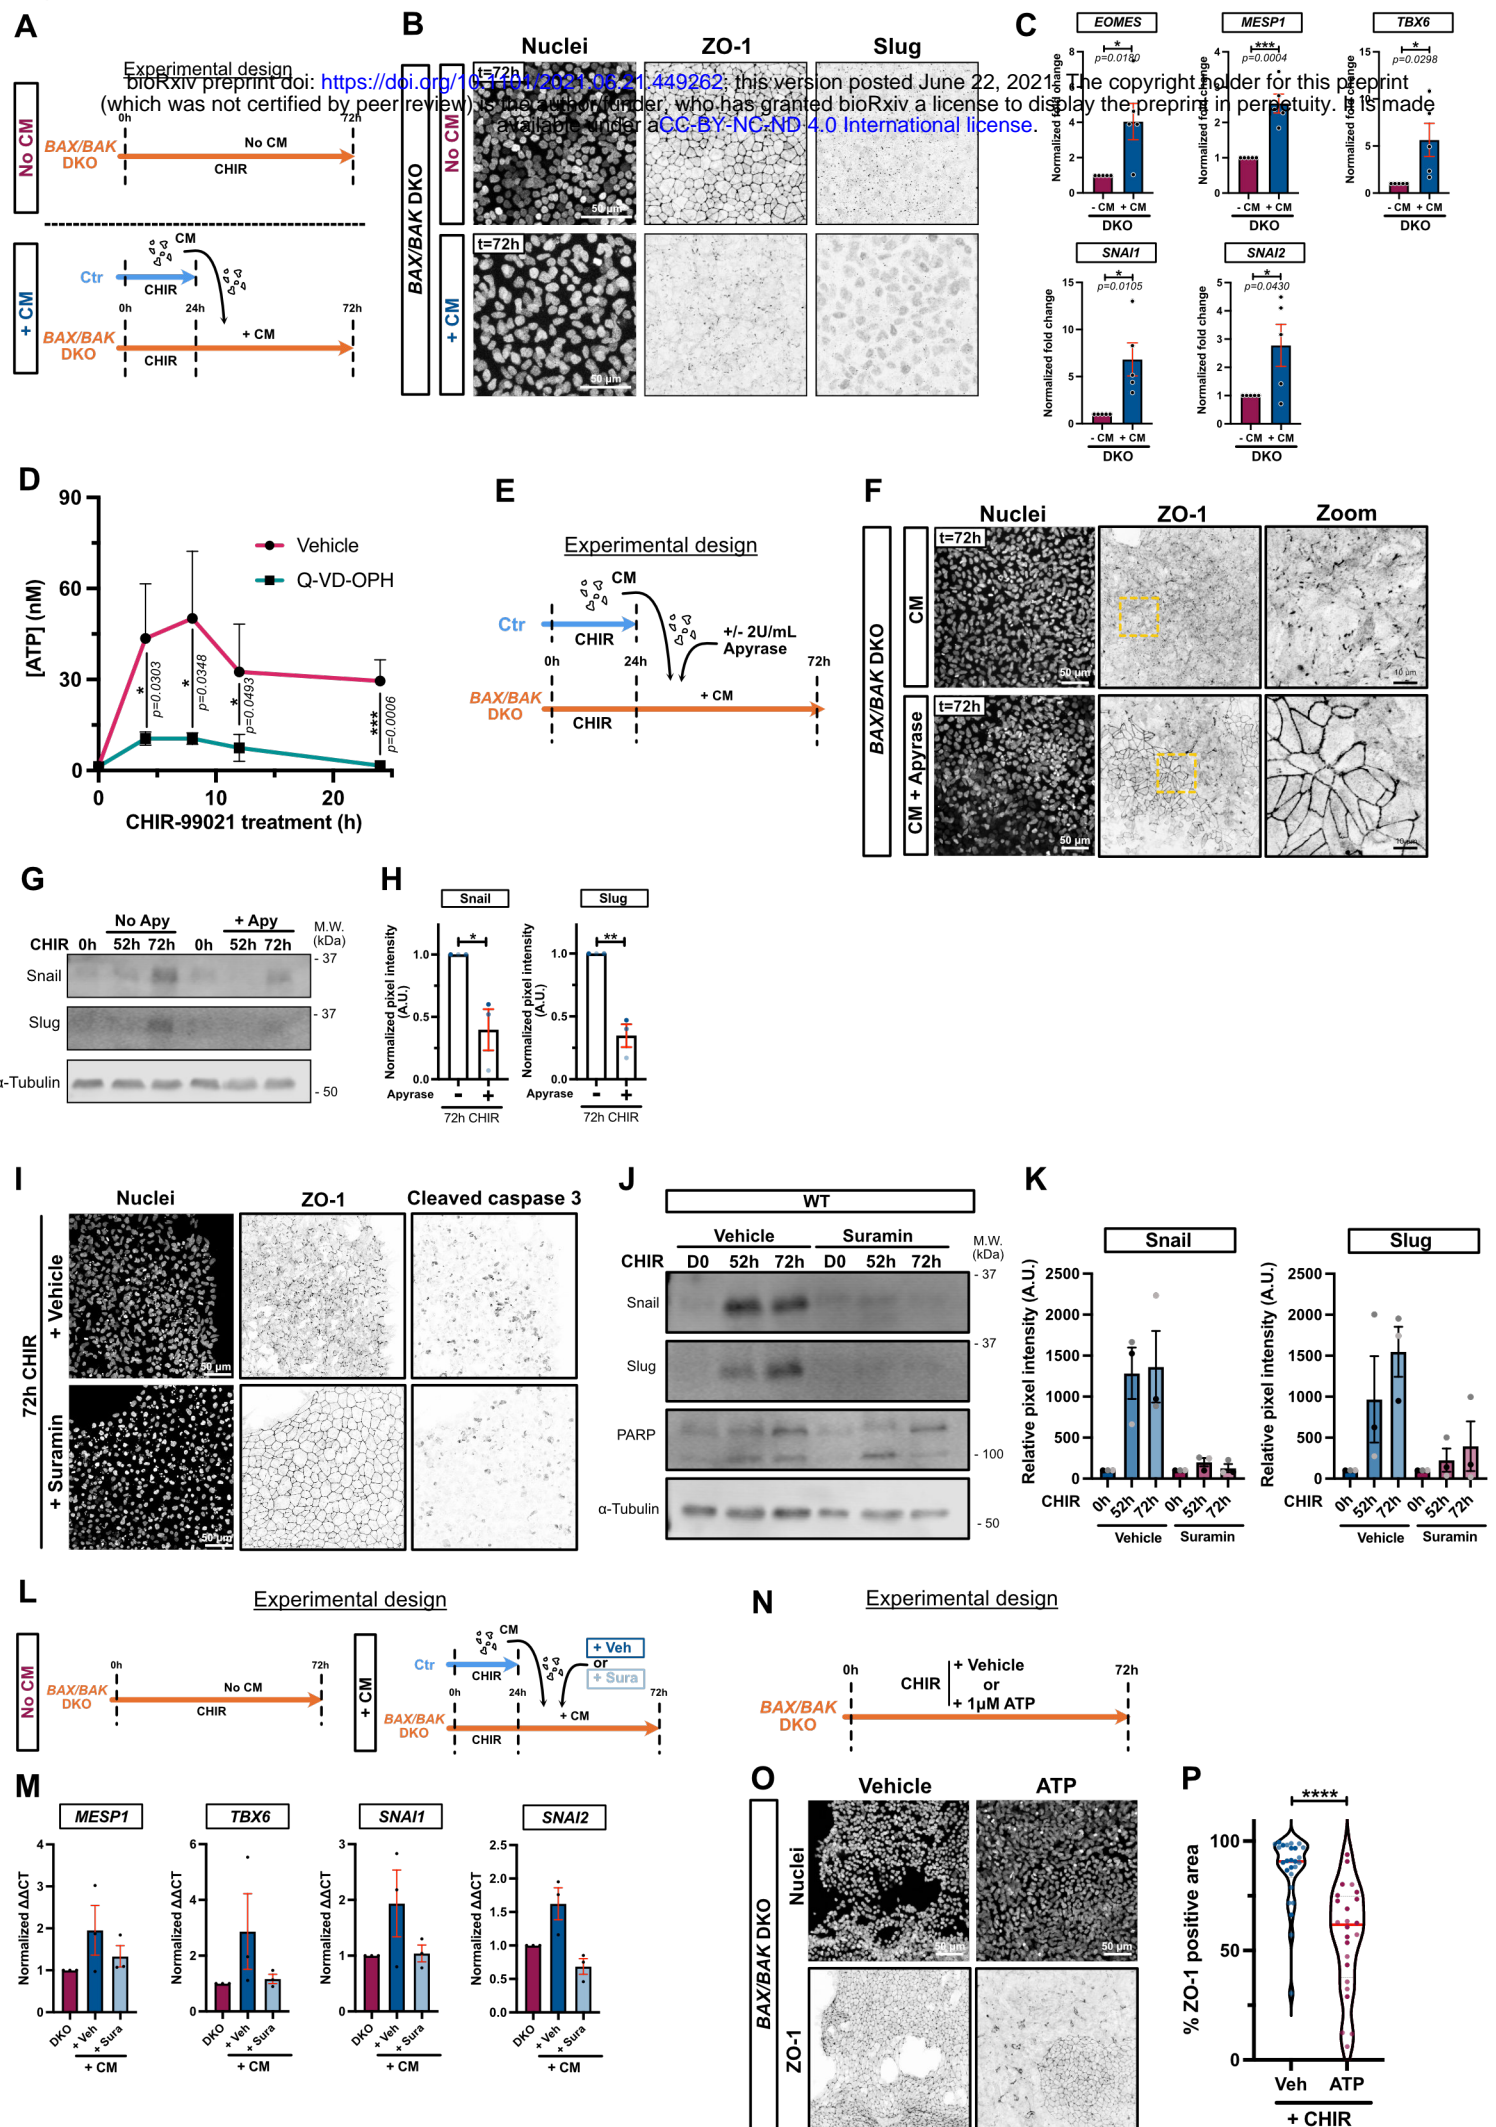



## Figure 5

A) Timeline of conditioned media (CM) experiment.

B) Immunofluorescence pictures of *BAX/BAK* DKO cells, pre-treated with CHIR for 24h and incubated for another 48h without (top) or with (bottom) condition media. Cells were fixed at 72h and stained for ZO-1, Slug, and nuclei. Maximum intensity projections are shown. Scale bar = 50  $\mu\text{m}$ .

C) Relative gene expression of *EOMES*, *MESP1*, *TBX6*, *SNAI1* and *SNAI2* obtained from *BAX/BAK* DKO hiPSCs treated as described in A and analyzed by qRT-PCR across 5 independent biological repeats. Fold change in  $\Delta\Delta\text{Ct}$  values was normalized to - CM condition. Error bar = Mean +/- S.E.M. Paired t test was applied (\*  $p \leq 0.05$ , \*\*\*  $p \leq 0.001$ ).

D) Time course of ATP release from dying cells. Luciferase assay was performed on supernatants from hiPSCs treated with CHIR +/- 10  $\mu\text{M}$  Q-VD-OPH at indicated timepoints. Luminescence was converted to [ATP] using a standard curve. Three independent biological replicates (2 technical replicates each) were plotted as a line graph with mean +/- S.D. Two-way ANOVA with Sidak's multiple comparisons test was applied (\*  $p \leq 0.05$ , \*\*\*  $p \leq 0.001$ ).

E) Timeline of apyrase-treated conditioned media (CM) experiment.

F) Representative immunofluorescence pictures of *BAX/BAK* DKO cells fixed after adding apyrase-treated CM as depicted in (E). Cells were stained for ZO-1 and nuclei. Maximum intensity projections are shown. Scale bar = 50  $\mu\text{m}$ . Magnified area (yellow dotted square) is shown for the ZO-1 channel. Scale bar = 10  $\mu\text{m}$ .

G-H) Immunoblot analysis of WT hiPSCs treated with CHIR +/- 2U/mL Apyrase and probed for Snail, Slug and alpha-Tubulin (G). Normalized expression of Snail and Slug was quantified by densitometry across 3 independent biological replicates (color-coded). Mean +/- S.E.M. Unpaired t-test was applied (\*  $p \leq 0.05$ , \*\*  $p \leq 0.01$ ) (H).

I) Immunofluorescence pictures of WT hiPSCs treated with CHIR +/- 100  $\mu\text{M}$  Suramin and stained for ZO-1, cleaved-caspase 3 and DNai. Maximum intensity projections are shown. Scale bar = 50  $\mu\text{m}$ .

J-K) Immunoblot analysis of WT hiPSCs treated with CHIR +/- 100  $\mu$ M Suramin and probed for Snail, Slug, PARP and  $\alpha$ -Tubulin (J). Normalized expression of Snail and Slug was quantified by densitometry across 3 independent biological replicates (color-coded) (K).

L) Timeline of conditioned media (CM) experiment with Suramin.

M) Relative gene expression of *MESP1*, *TBX6*, *SNAI1* and *SNAI2* obtained from *BAX/BAK* DKO hiPSCs treated as described in K and analyzed by qRT-PCR across 3 independent biological repeats. Mean +/- S.E.M.

N) Timeline of ATP sufficiency experiment

O) Immunofluorescence images of *BAX/BAK* DKO hiPSCs treated with CHIR +/- 1  $\mu$ M ATP and stained for ZO-1 and nuclei. Maximum intensity projections are shown. Scale bar = 50  $\mu$ m.

P) Violin plot showing percentage of ZO-1 positive areas across 2 independent biological samples (3 large images per repeat (5mm x 5mm) obtained by tiling). Mann-Whitney test was applied (\*\*\*\*  $p \leq 0.001$ ).

# Supp. 1

bioRxiv preprint doi: <https://doi.org/10.1101/2021.06.21.449262>; this version posted June 22, 2021. The copyright holder for this preprint (which was not certified by peer review) is the author/funder, who has granted bioRxiv a license to display the preprint in perpetuity. It is made available under aCC-BY-NC-ND 4.0 International license.

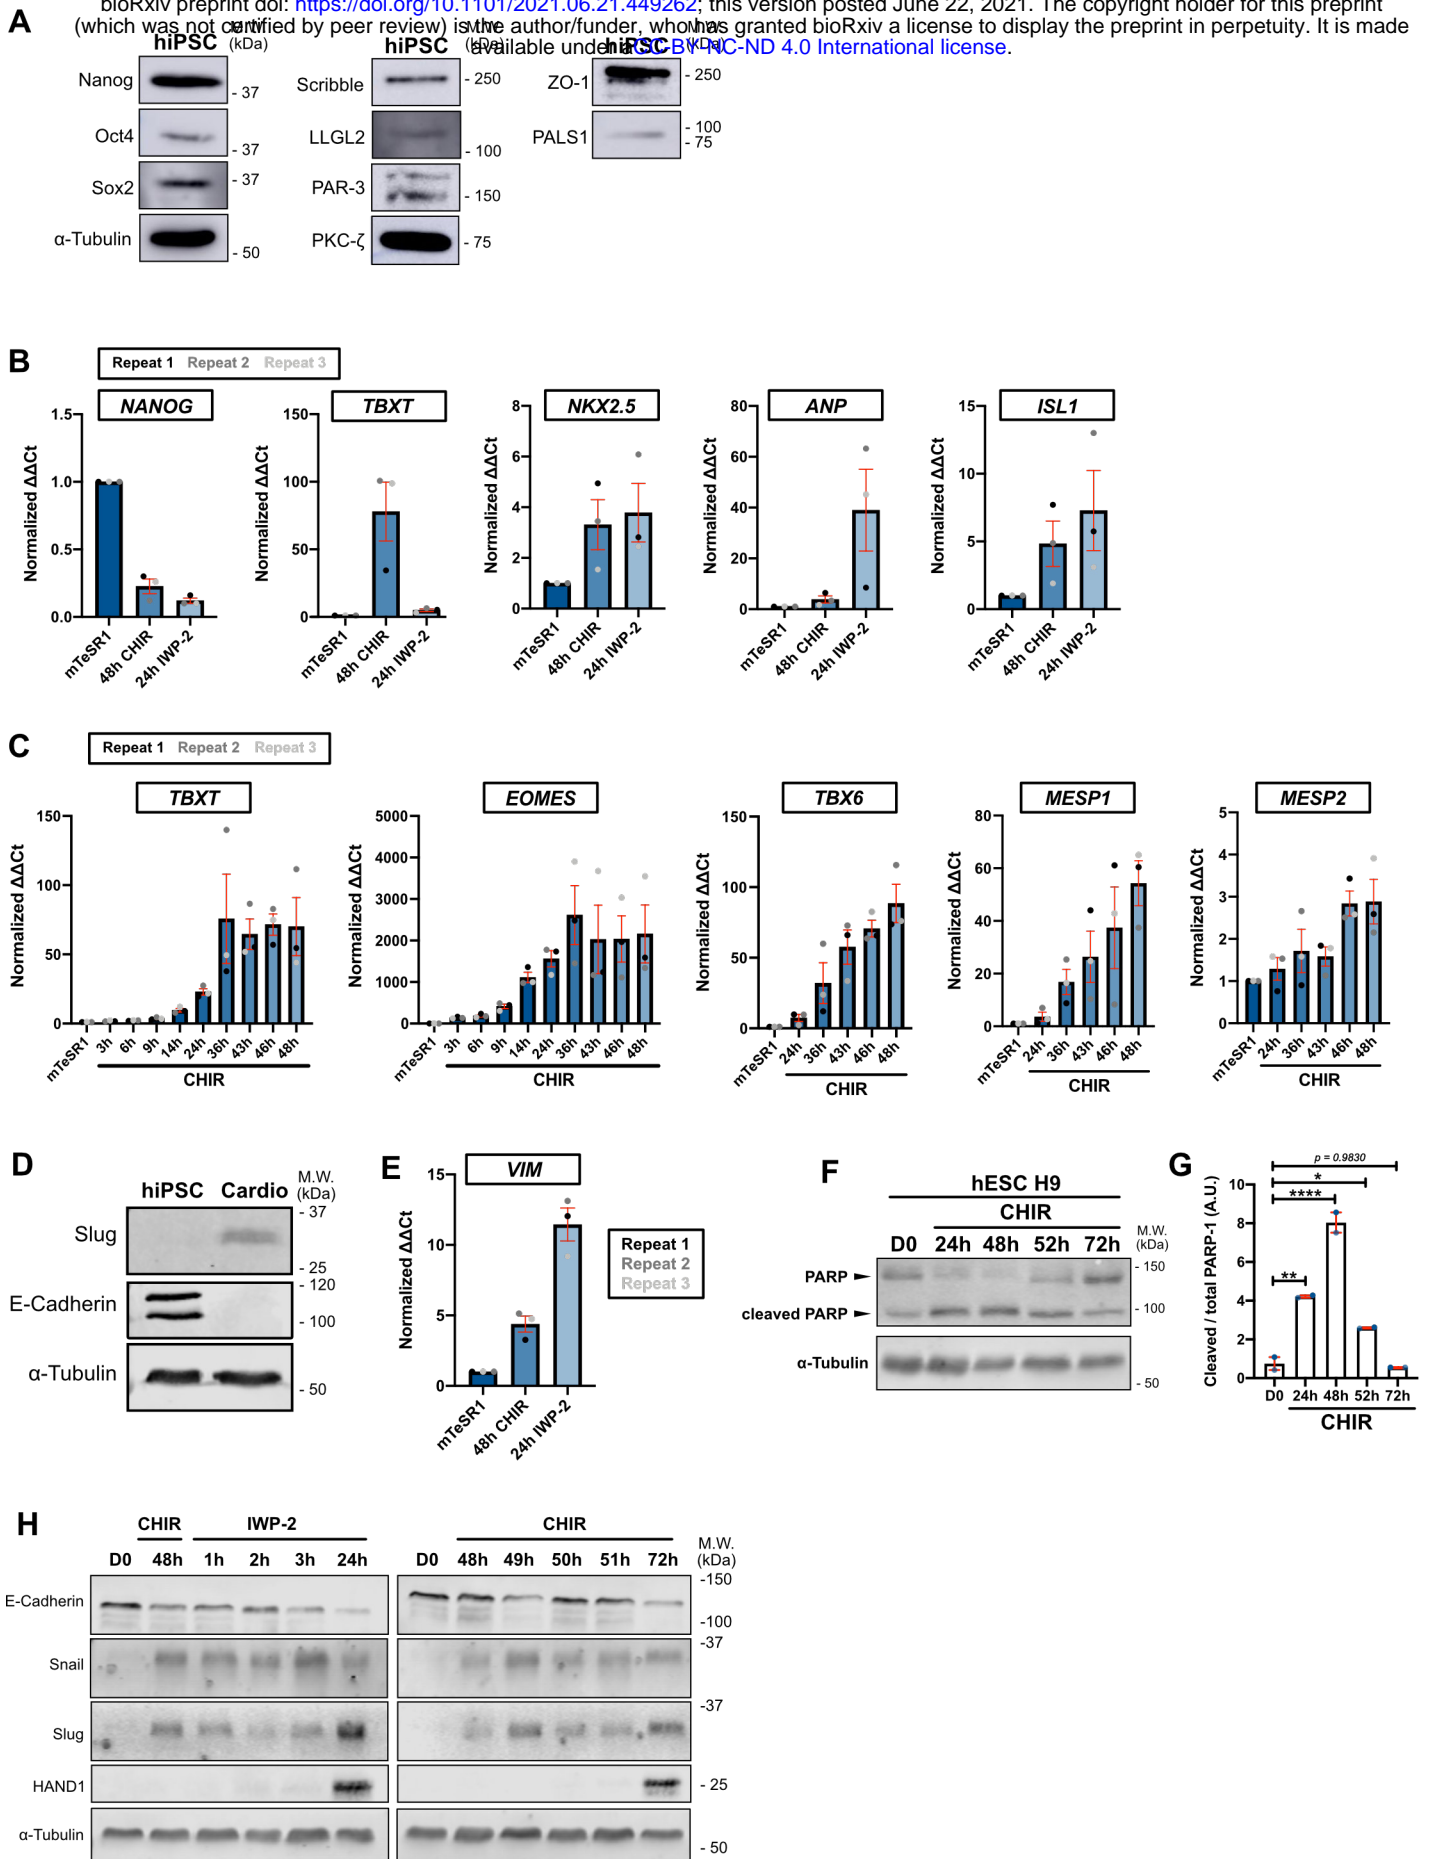



### Supp. Fig. 1

A) Immunoblot of WT hiPSC for pluripotency markers (Nanog, Oct4, Sox2), tight junctions marker (ZO-1), Crumb complex (PALS1), PAR complex (PAR-3, PKC- $\zeta$ ), Scribble complex (LLGL2, Scribble) and  $\alpha$ -Tubulin. Molecular weights (M.W.) are indicated in kDa.

B) Relative gene expression of *NANOG*, *TBXT*, *NKX2.5*, *ANP*, *ISL1* before (mTeSR1) and during differentiation to mesoderm (CHIR) and cardiac mesoderm (IWP-2).  $\Delta\Delta$ Ct values were normalized to the mTeSR1 condition. Independent biological repeats are color-coded (n=3). Mean  $\pm$  S.E.M.

C) Relative gene expression of *TBXT*, *EOMES*, *TBX6*, *MESP1*, *MESP2* before (mTeSR1) and during CHIR induction.  $\Delta\Delta$ Ct values were normalized to the mTeSR1 condition. Independent biological repeats are color-coded (n=3). Mean  $\pm$  S.E.M.

D) Immunoblot of hiPSCs and hiPSC-derived cardiomyocytes obtained after applying the differentiation protocol described in Fig. 1B. Expression of EMT markers (Slug and E-Cadherin) were analyzed. Molecular weights (M.W.) are indicated in kDa.

E) Relative gene expression of *VIM* was analyzed by qRT-PCR during cell conversion.  $\Delta\Delta$ Ct values were normalized to the mTeSR1 condition. Independent biological repeats are color-coded (n=3). Mean  $\pm$  S.E.M.

F-G) Immunoblot of PARP cleavage in hESC H9 during CHIR treatment. Molecular weights (M.W.) are indicated in kDa (F). PARP cleavage was quantified by densitometry across 2 independent biological repeats (color-coded). Tukey's multiple comparison was applied (\*  $p \leq 0.05$ , \*\*  $p \leq 0.01$ , \*\*\*  $p \leq 0.001$ ) (G).

H) Immunoblot comparing expression of EMT markers (E-Cadherin, Snail, Slug) and cardiac marker (HAND1) between the 2 protocols shown in Fig. 1A.

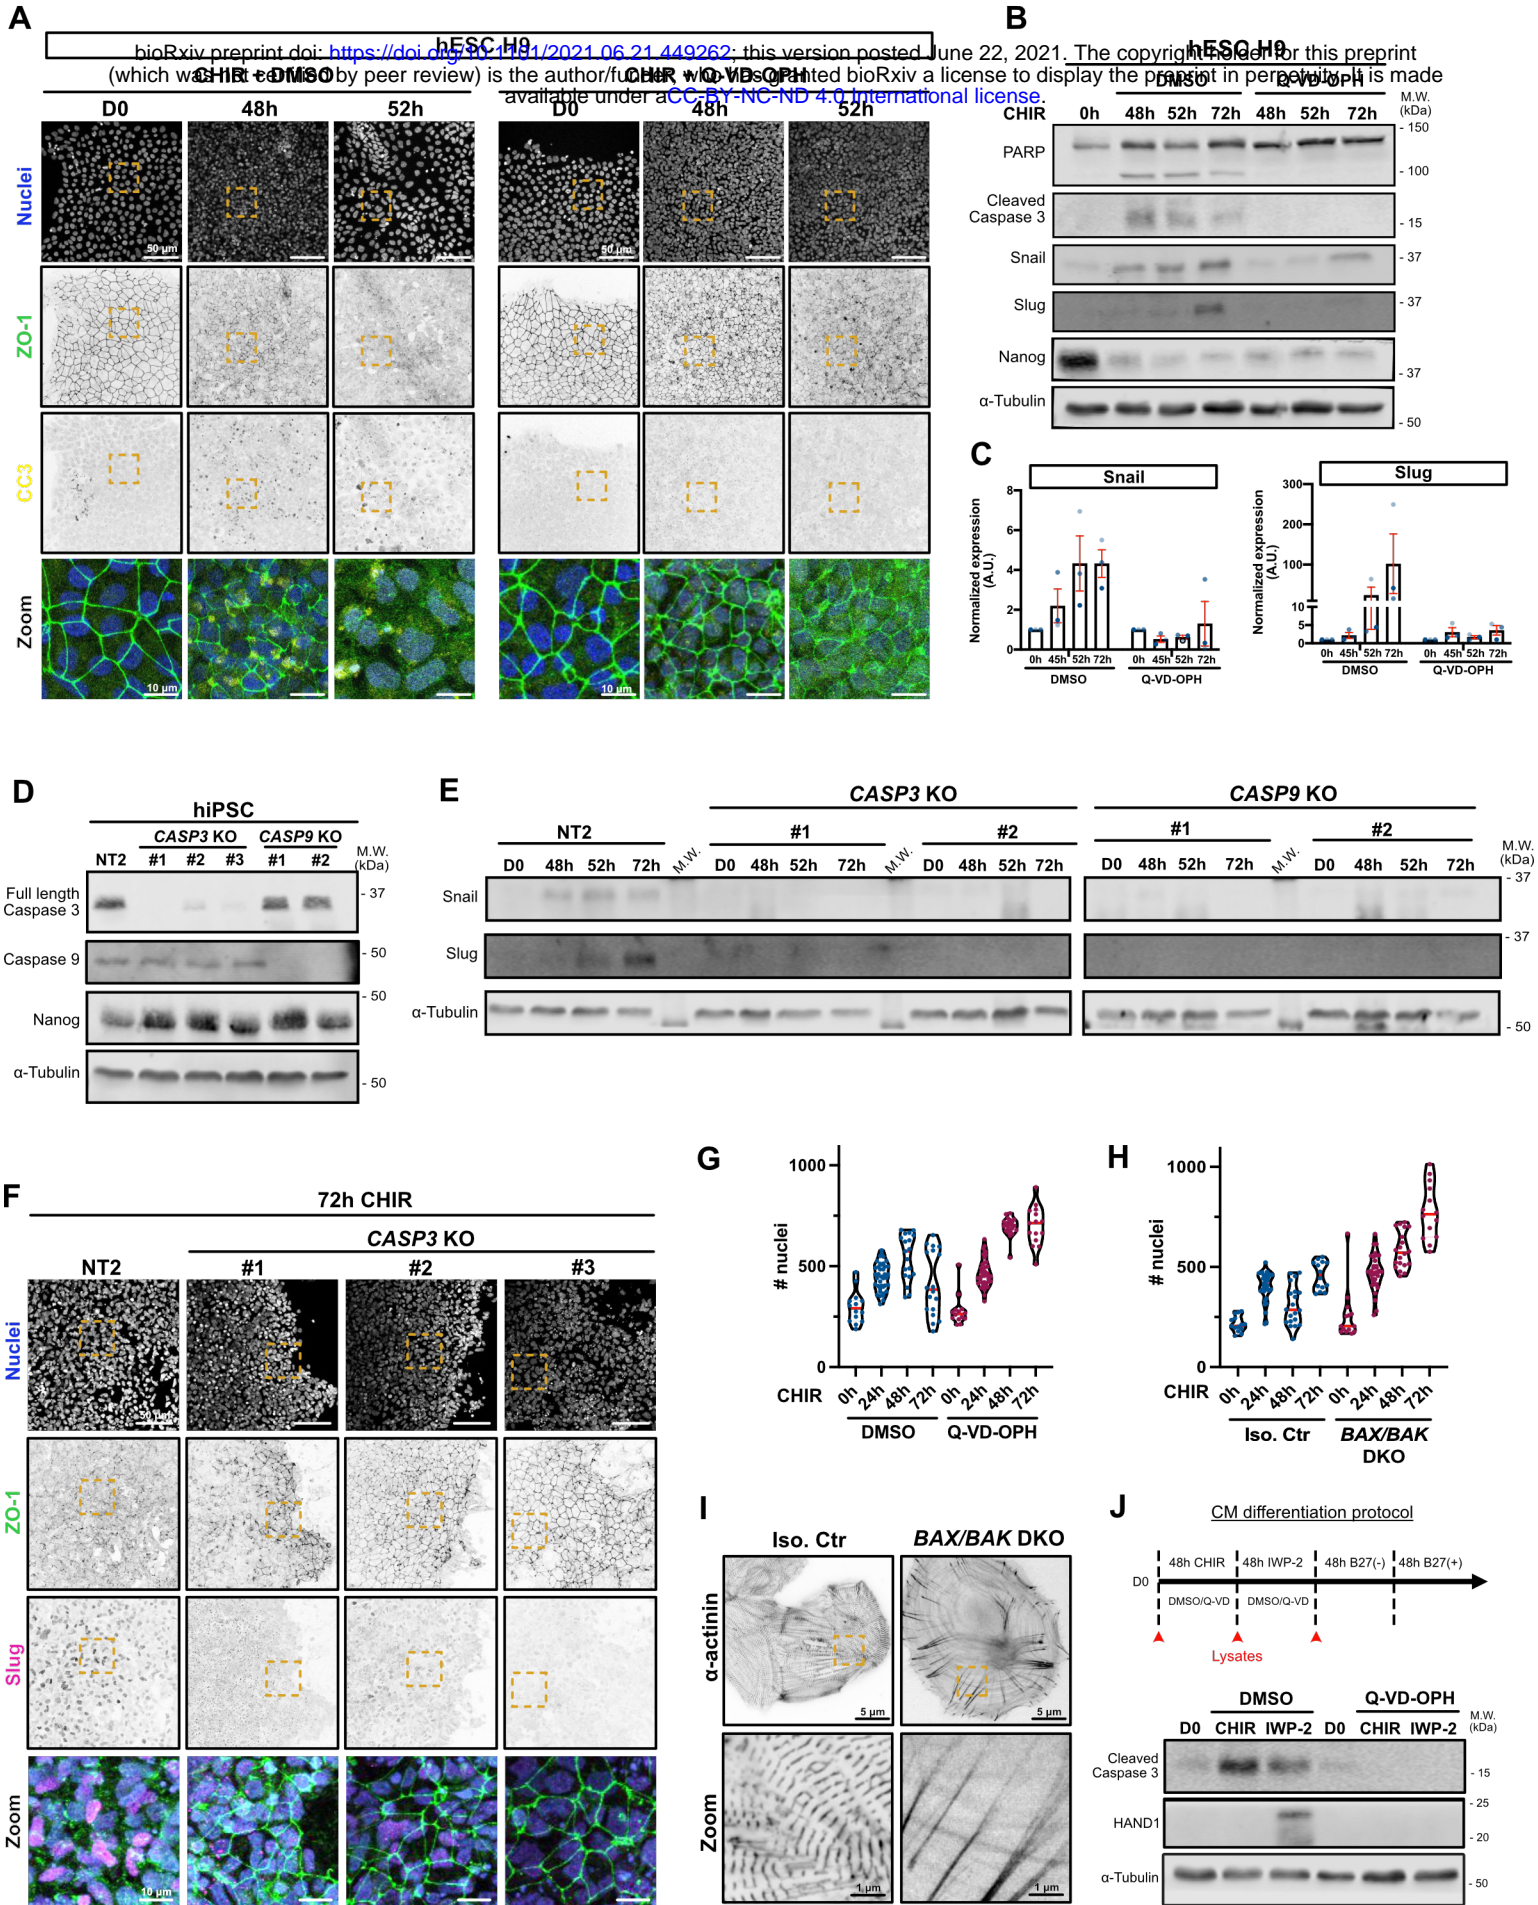

A) Representative immunofluorescence images of hESC H9 co-treated with CHIR and DMSO (left) or CHIR and 10  $\mu$ M Q-VD-OPH (right) stained for ZO-1 (green), cleaved caspase 3 (yellow) and nuclei (blue). Maximum intensity projections are shown. Scale bar = 50  $\mu$ m. Magnified area (yellow dotted square) is shown as a merge. Scale bar = 10  $\mu$ m.

B-C) Immunoblot analysis of hESC H9 co-treated with CHIR plus DMSO or 10  $\mu$ M Q-VD-OPH. Molecular weights (M.W.) are indicated in kDa (B). Normalized expression of Snail and Slug was quantified by densitometry across 3 independent biological replicates (color-coded). Mean  $\pm$  S.E.M. (C).

D) Immunoblot of *CASP3* and *CASP9* KO cell lines (non clonal). Knock-out validation was performed by probing for Caspase 3 and Caspase 9 expression, as well as Nanog as a stem cell marker. Molecular weights (M.W.) are indicated in kDa.

E) Immunoblot of control Non Targeted (NT2) and *CASP3* and *CASP9* KO cell lines, analyzed for Snail and Slug expression upon CHIR induction. Molecular weights (M.W.) are indicated in kDa.

F) Representative immunofluorescence images of Non targeted (NT2) and *CASP3* and *CASP9* KO hiPSCs, induced 72h with CHIR and stained for ZO-1 (green), Slug (magenta) and nuclei (blue). Maximum intensity projections are shown. Scale bar = 50  $\mu$ m. Magnified area (yellow dotted square) is shown as a merge. Scale bar = 10  $\mu$ m.

G-H) Violin plots representing numbers of nuclei over time for WT hiPSCs co-treated with CHIR and Q-VD-OPH (G) or BAX/BAK DKO hiPSCs treated with CHIR. (Median: plain red line – Quartiles: black dotted lines). Three independent biological repeats (5-12 random fields of view/repeat).

I) Immunofluorescent images of isogenic control and *BAX/BAK* DKO hiPSC-derived cardiomyocytes, plated at low density and stained for alpha-actinin. Scale bar = 5  $\mu$ m. Magnified area (yellow dotted square) is shown. Scale bar = 1  $\mu$ m.

J) Immunoblot analysis of hiPSC treated with CHIR and IWP-2 co-treated or not with 10  $\mu$ M Q-VD-OPH and probed for cleaved caspase 3 and cardiac marker HAND1. Cell lysates were collected as indicated on the timeline (red arrows).



# Supp. 4

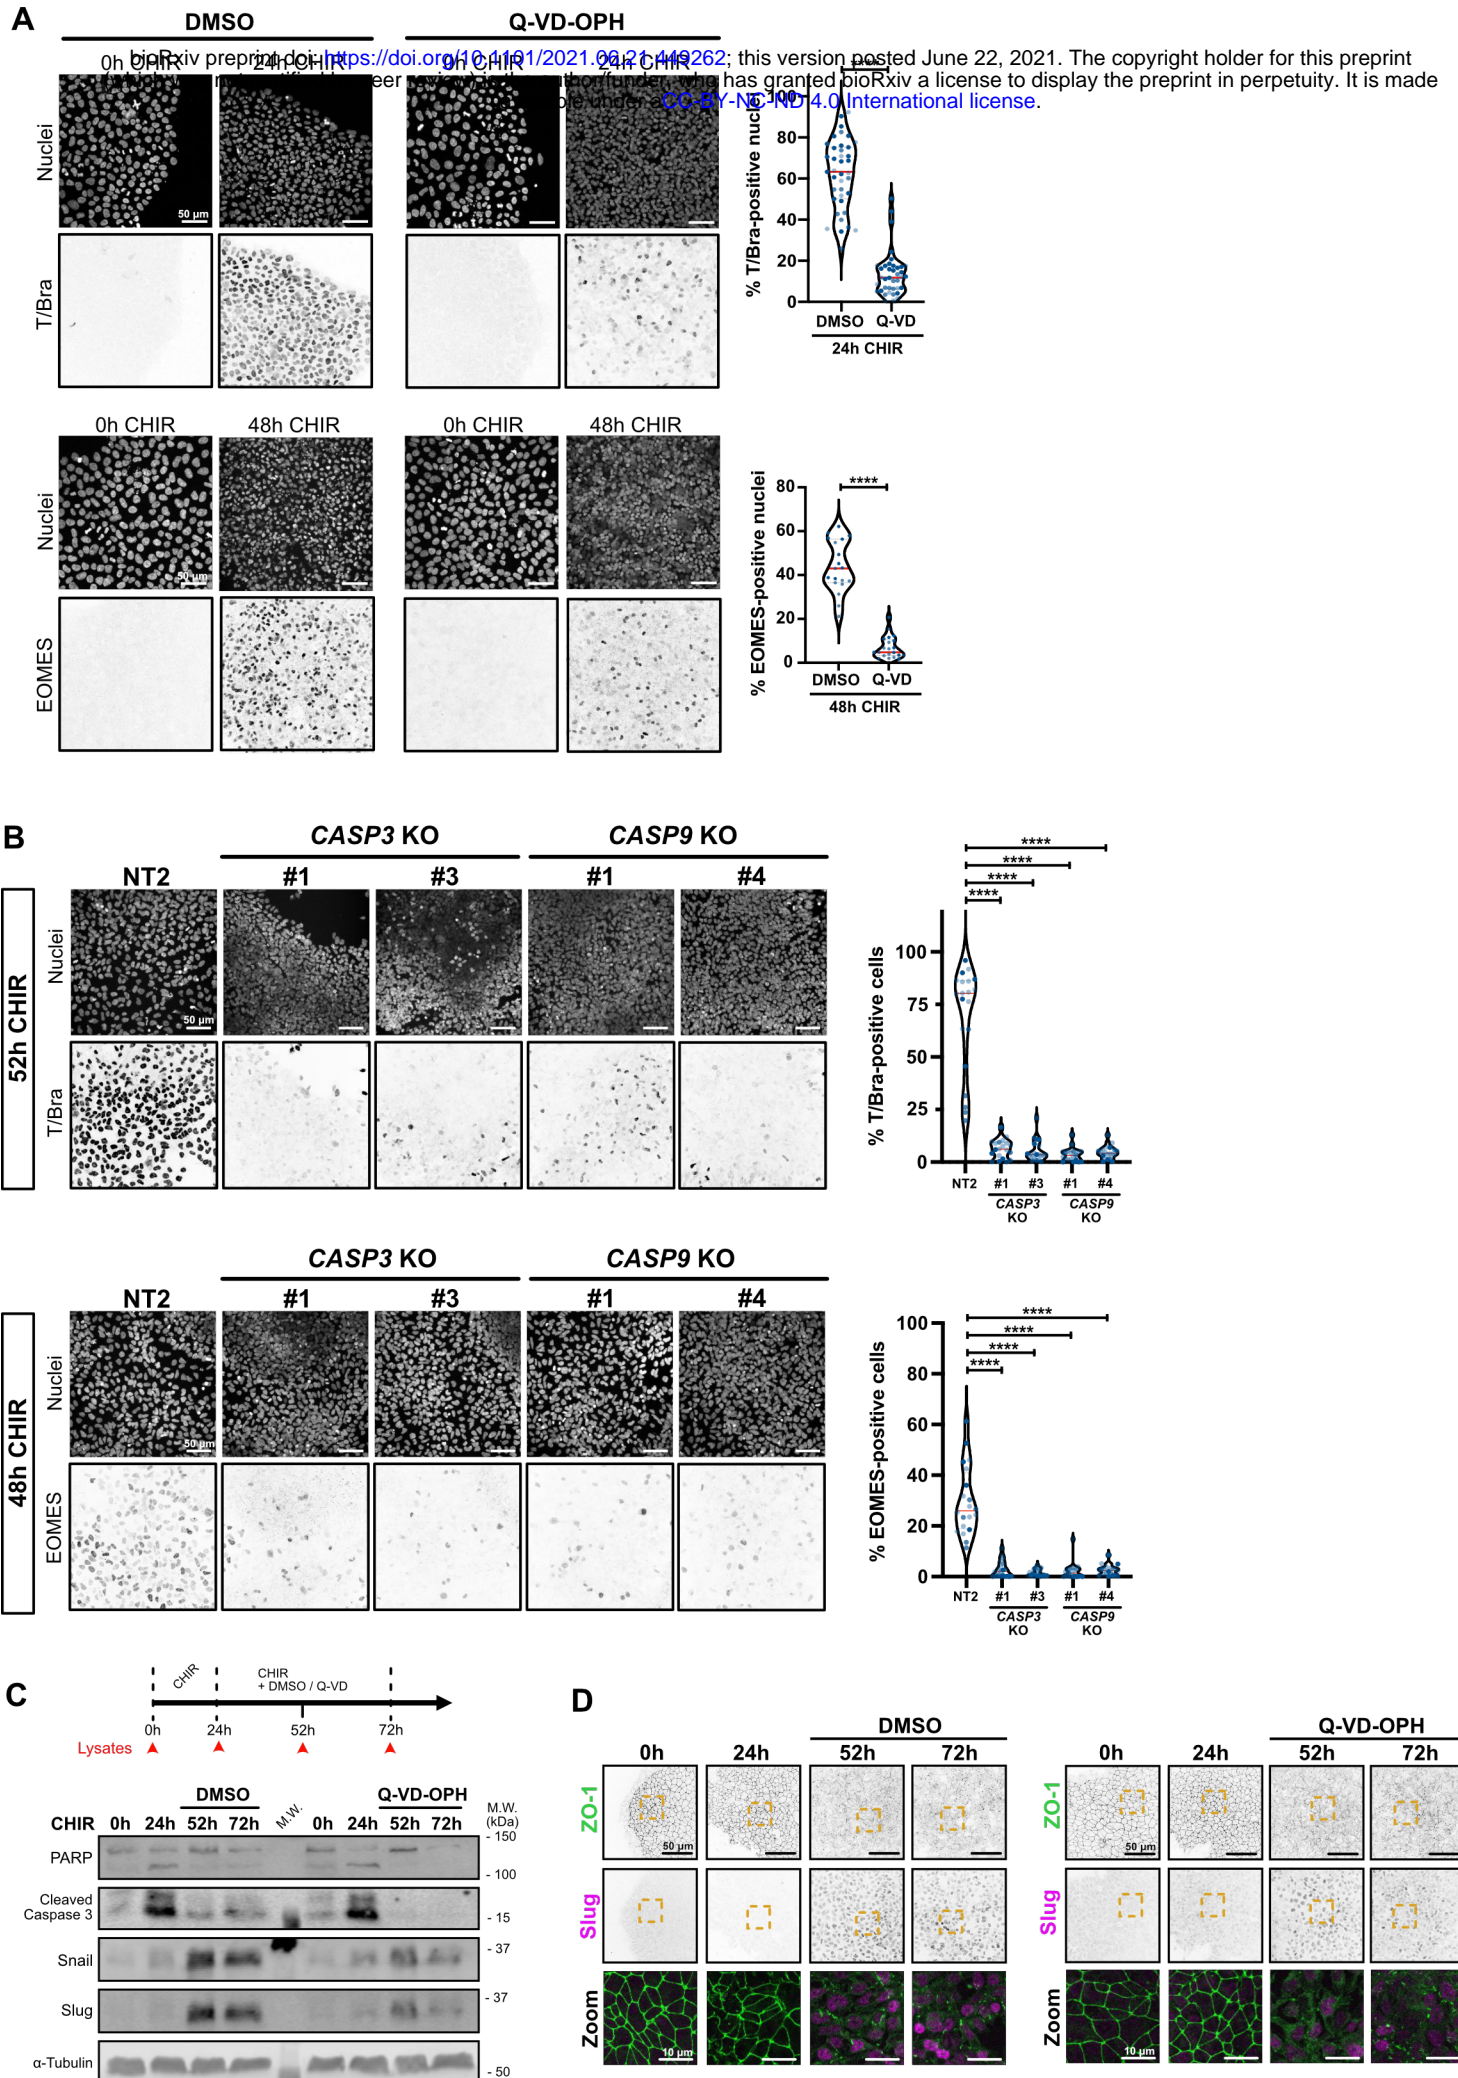

#### Supp. Fig. 4

A) Representative immunofluorescence images of WT hiPSCs co-treated with CHIR +/- Q-VD-OPH and stained for T/Bra (top), EOMES (bottom) and nuclei, before (0h) and after CHIR treatment. Maximum intensity projections are shown. Scale bar = 50  $\mu$ m. Violin plots summarize quantification of the percentage of T/Bra-positive (top) and EOMES-positive (bottom) nuclei after CHIR treatment (Median: plain red line – Quartiles: black dotted lines). Independent biological repeats are color-coded (n=3, 10-13 random fields of view/repeat for T/Bra and n=2, 10 random fields of view/repeat for EOMES). Mann-Whitney test was applied (\*\*\*\*  $p \leq 0.001$ ).

B) Representative immunofluorescence images of control NT2, *CASP3* and *CASP9* KO hiPSCs stained for T/Bra (top), EOMES (bottom) and nuclei after CHIR treatment. Maximum intensity projections are shown. Scale bar = 50  $\mu$ m. Violin plots summarize quantification of the percentage of T/Bra-positive (top) and EOMES-positive (bottom) nuclei after CHIR treatment (Median: plain red line – Quartiles: black dotted lines). Independent biological repeats are color-coded (n=3, 5-7 random fields of view/repeat. Kruskal-Wallis test was applied (\*\*\*\*  $p \leq 0.001$ ).

C) Immunoblot analysis of hiPSCs treated with CHIR only for 24h, before adding CHIR +/- 10  $\mu$ M Q-VD-OPH for another 28h and 48h with CHIR (respectively 52h and 72h timepoint). Treatment timing is indicated on the timeline and lysate collection is depicted by red arrows. ). Molecular weights (M.W.) are indicated in kDa.

D) Representative immunofluorescence images of hiPSCs treated with CHIR for 24h before addition of 10  $\mu$ M Q-VD-OPH or DMSO. Cells were cultured for another 28h or 72h and stained for ZO-1 (green) and Slug (magenta). Maximum intensity projections are shown. Scale bar = 50  $\mu$ m. Magnified area (yellow dotted square) is shown as a merge (bottom row). Scale bar = 10  $\mu$ m.



Supp. 5

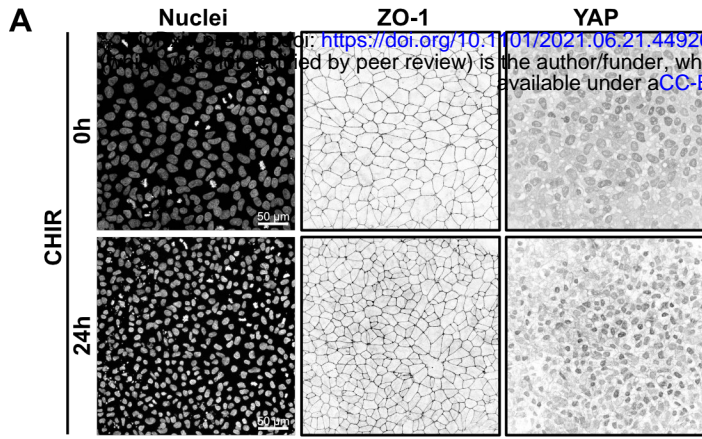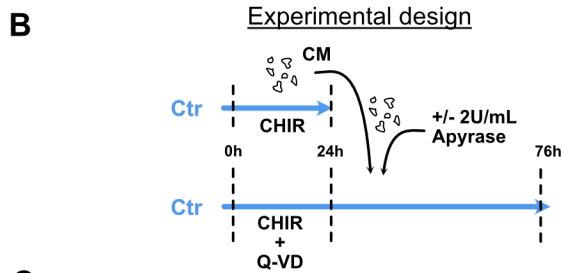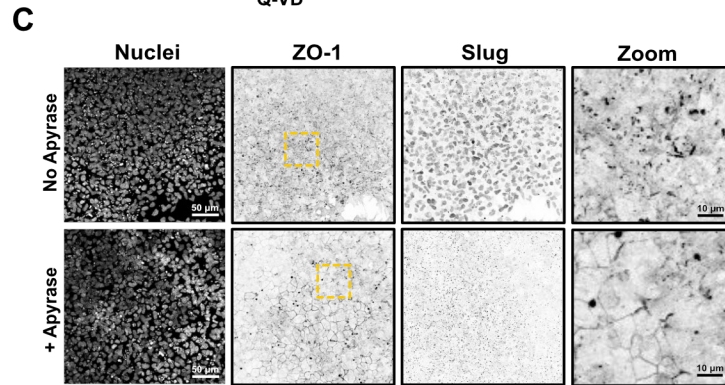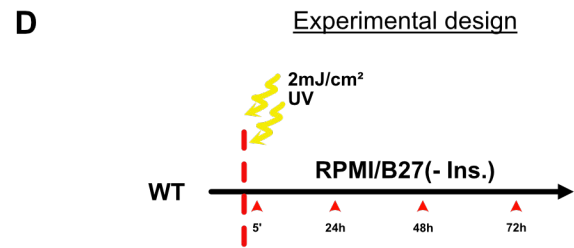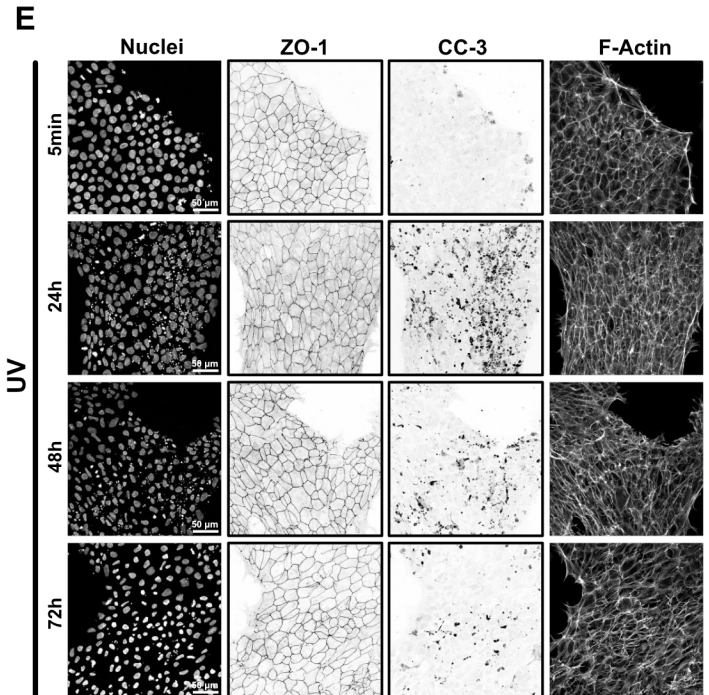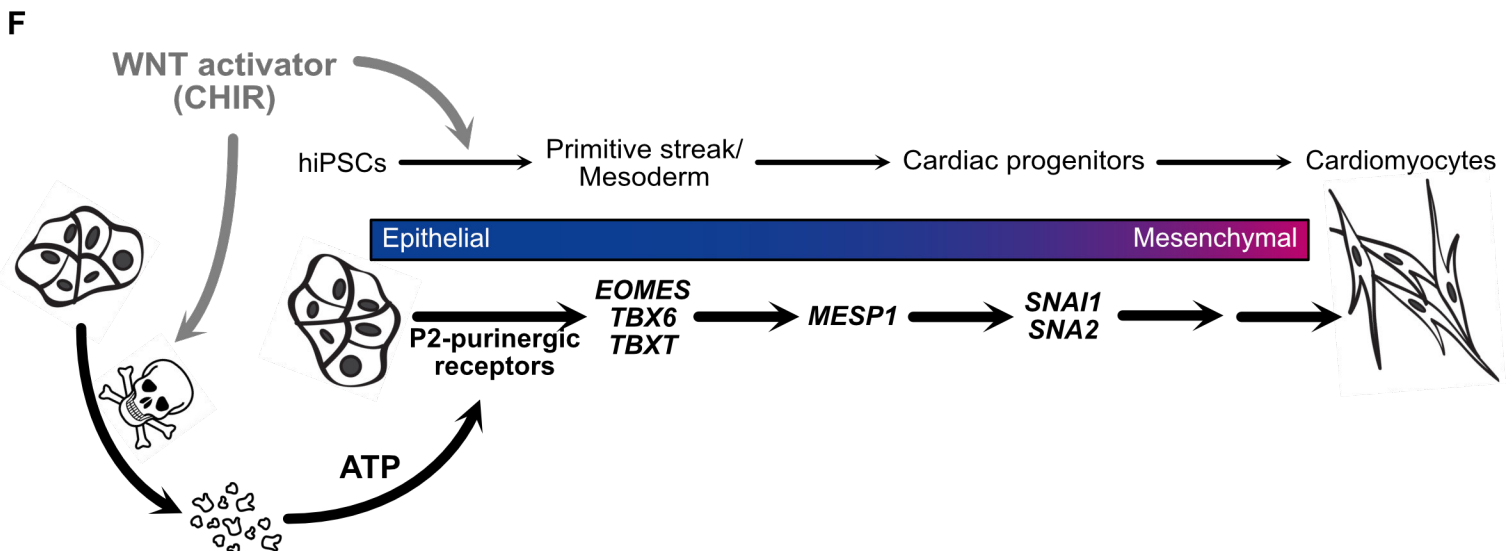



### Supp. Fig. 5

A) Representative immunofluorescence pictures of WT hiPSCs fixed after CHIR treatment and stained for ZO-1, YAP and nuclei. Maximum intensity projections are shown. Scale bar = 50  $\mu\text{m}$ .

B) Timeline of apyrase-treated conditioned media (CM) experiment.

C) Representative immunofluorescence pictures of WT cells fixed after adding apyrase-treated CM as depicted in (B). Cells were stained for ZO-1, Slug and nuclei. Maximum intensity projections are shown. Scale bar = 50  $\mu\text{m}$ . Magnified area (yellow dotted square) is shown for the ZO-1 channel. Scale bar = 10  $\mu\text{m}$ .

D) Timeline for UV exposure. WT hiPSCs were irradiated with  $2\text{mJ}/\text{cm}^2$ , kept in RPMI/B27(-Ins) media without CHIR and fixed at the indicated timepoint (red arrowheads).

E) Representative immunofluorescence images from UV-irradiated hiPSC, stained for nuclei, ZO-1, cleaved caspase-3 (CC-3) and F-actin. Maximum intensity projections are shown. Scale bar = 50  $\mu\text{m}$ .

F) Working model

**Table 1: Lab reagents**

| <b>Name</b>                                | <b>Manufacturer</b>          | <b>Cat. Number</b> |
|--------------------------------------------|------------------------------|--------------------|
| Matrigel                                   | Corning                      | # 354277           |
| DMEM/F12                                   | Gibco                        | # 11039-021        |
| mTeSR1                                     | StemCell Technologies        | # 85850            |
| Gentle Cell dissociation                   | StemCell Technologies        | # 07174            |
| DMEM                                       | Gibco                        | # 11965-092        |
| Fetal bovin Serum                          | Atlantic                     | # S11150           |
| Fetal bovin Serum                          | Peak                         | # PS-FB1           |
| Y-27632                                    | Cayman Chemical              | # 10005583         |
| RPMI 1640                                  | Gibco                        | # 22400089         |
| 50X B27 Minus Insulin (-Ins)               | Gibco                        | # A1895601         |
| 50X B27 Plus Insulin (+Ins)                | Gibco                        | # 17504044         |
| IWP-2                                      | Tocris                       | # 3533             |
| CHIR-99021                                 | Tocris                       | # 4423             |
| Precision Red                              | Cytoskeleton                 | # ADV02-A          |
| Fluoromount-G™ Slide Mounting Medium       | Electron Microscopy Sciences | # 17984-25         |
| Amicon centrifugal filter unit             | EMD Millipore                | # UFC910024        |
| Puromycin                                  | Gibco                        | # A11138-03        |
| 35mm coverslip dish                        | MatTek                       | # P35G-1.5-10-C    |
| 32% Paraformaldehyde                       | Electron Microscopy Sciences | # 157-14-S         |
| Rneasy Mini kit                            | Qiagen                       | # 74104            |
| SuperScript III First-Strand Synthesis kit | Invitrogen                   | # 12574-018        |
| Maxima SYBR Green/Fluorescein Master Mix   | Thermo Fisher Scientific     | # K0242            |
| Annexin V apoptosis kit APC                | eBioscience                  | # 88-8007          |
| RealTime-Glo Extracellular ATP Assay       | Promega                      | # GA5010           |
| Apyrase                                    | NED                          | # M0398L           |
| Suramin hexasodium salt                    | Tocris                       | # 1472             |
| ATP                                        | Sigma                        | # A1852            |

**Table 2: Antibodies**

| Name              | Manufacturer                   | Cat. Number   | Application | Dilution |
|-------------------|--------------------------------|---------------|-------------|----------|
| E_Cadherin        | Cell Signaling Technologies    | # 3195        | WB          | 1:1000   |
|                   | Invitrogen                     | # 13-1900     | IF          | 1:500    |
| Slug              | Cell Signaling Technologies    | # 9585        | WB          | 1:1000   |
|                   |                                |               | IF          | 1:500    |
| Snail             | Cell Signaling Technologies    | # 3895        | WB          | 1:1000   |
| Vimentin          | Cell Signaling Technologies    | # 5741        | IF          | 1:500    |
| Zeb1              | Cell Signaling Technologies    | # 3396        | WB          | 1:1000   |
| GATA4             | Cell Signaling Technologies    | # 36966       | WB          | 1:1000   |
| Nanog             | Cell Signaling Technologies    | # 4903        | WB          | 1:1000   |
| Oct4              | Cell Signaling Technologies    | # 75463       | WB          | 1:1000   |
| Sox2              | Cell Signaling Technologies    | # 3579        | WB          | 1:1000   |
| Alpha-Tubulin     | Sigma-Aldrich                  | # T9026       | WB          | 1:3000   |
| ZO-1              | Invitrogen                     | # 339100      | WB          | 1:200    |
|                   |                                |               | WB          | 1:500    |
| cTnT              | Gift from Prof. Dylan Burnette |               | WB          | 1:500    |
| Nkx2.5            | Cell Signaling Technologies    | # 8792        | WB          | 1:1000   |
| Cleaved caspase 3 | Cell Signaling Technologies    | # 9664        | WB          | 1:1000   |
|                   |                                |               | IF          | 1:200    |
| PARP              | Cell Signaling Technologies    | # 9542        | WB          | 1:1000   |
| Scribble          | Santa Cruz Biotechnology       | # sc-11048    | WB          | 1:500    |
|                   |                                |               | IF          | 1:200    |
| LLGL2             | Santa Cruz Biotechnology       | # sc-130158   | WB          | 1:500    |
| PAR-3             | Homemade                       |               | WB          | 1:500    |
|                   |                                |               | IF          | 1:200    |
| PKC- $\zeta$      | Santa Cruz Biotechnology       | # sc-17781    | WB          | 1:500    |
|                   |                                |               | IF          | 1:200    |
| PALS-1            | Homemade                       |               | WB          | 1:500    |
|                   |                                |               | IF          | 1:200    |
| HAND-1            | R & D Systems                  | # AF3168      | WB          | 1:500    |
| EOMES             | Cell Signaling Technologies    | # 81493       | IF          | 1:200    |
| T/Bra             | abcam                          | # ab209665    | IF          | 1:200    |
|                   |                                |               | WB          | 1:1000   |
| alpha actinin 2   | Signa                          | A7811         | IF          | 1:500    |
| YAP               | Novus                          | # NB110-58358 | IF          | 1:200    |

**Table 2: Secondary Antibodies**

|                                                      |            |            |    |         |
|------------------------------------------------------|------------|------------|----|---------|
| Alexa Fluor 680 donkey anti-mouse IgG (H+L)          | Invitrogen | # A10038   | WB | 1:10000 |
| Goat anti-Rabbit (H&L), DyLight 800 4X PEG conjugate | Invitrogen | # SA535571 | WB | 1:10000 |
| Alexa Fluor 594 goat anti-rabbit IgG (H+L)           | Invitrogen | # A11037   | IF | 1:500   |
| Alexa Fluor 488 goat anti-mouse IgG (H+L)            | Invitrogen | # A11029   | IF | 1:500   |
| Alexa Fluor 488 goat anti-rat IgG (H+L)              | Invitrogen | # A11006   | IF | 1:500   |

**Table 2: Others**

|                            |            |          |    |       |
|----------------------------|------------|----------|----|-------|
| Alexa Fluor 647 Phalloidin | Invitrogen | # A22287 | IF | 1:500 |
| Hoechst 33342              | Invitrogen | # H1399  | IF | 1:500 |

**Table 3: CRISPR-Cas9 sgRNA \***

| Name                 | Sequence (5'->3')         | Comment |        |
|----------------------|---------------------------|---------|--------|
| H.s. MESP1 #1 Fwd    | CACCGCGAGTCCTGGATGCTCTCTG |         |        |
| H.s. MESP1 #1 Rev    | aaacCAGAGAGCATCCAGGACTCGc |         |        |
| H.s. MESP1 #2 Fwd    | CACCGAGACACGGACGCAGGCTGAG |         |        |
| H.s. MESP1 #2 Rev    | aaacCTCAGCCTGCGTCCGTGTCTc |         |        |
| H.s. MESP1 #3 Fwd    | CACCGGCCGTGCTAGGCCTCAGCG  |         |        |
| H.s. MESP1 #3 Rev    | aaacCGCTGAGGCCTAGCACGGCc  |         |        |
| H.s. MESP2 #1 Fwd    | CACCGACGGGGGCGACTGTATCTTG |         |        |
| H.s. MESP2 #1 Rev    | aaacCAAGATACAGTCGCCCCCGTc |         |        |
| H.s. MESP2 #2 Fwd    | CACCGTCCCTTGGGACGAATACGG  |         |        |
| H.s. MESP2 #2 Rev    | aaacCCGTATTCGTCCCAAGGGAc  |         |        |
| H.s. CASP3 #1 Fwd    | CACCGAGTTTCTGAATGTTCCCTG  |         |        |
| H.s. CASP3 #1 Rev    | aaacCAGGGAAACATTCAGAAACTc |         |        |
| H.s. CASP3 #2 Fwd    | CACCGTGTGCATGCAGCAAACCTCA |         |        |
| H.s. CASP3 #2 Rev    | aaacTGAGGTTTGCTGCATCGACAc |         |        |
| H.s. CASP3 #3 Fwd    | CACCGGAAGCGAATCAATGGACTC  |         |        |
| H.s. CASP3 #3 Rev    | aaacGAGTCCATTGATTGCTTCCc  |         |        |
| H.s. CASP9 #1 Fwd    | CACCGTTCAGGCCCATATGATCG   |         |        |
| H.s. CASP9 #1 Rev    | aaacCGATCATATGGGGCCTGAAC  |         |        |
| H.s. CASP9 #4 Fwd    | CACCGTACTCGCCATGGACGAAG   |         |        |
| H.s. CASP9 #4 Rev    | aaacCTTCGTCCATGGCGAGTAGc  |         |        |
| Hs SNAI1 Ex1.3 Fwd   | CACCGTGTAGTTAGGCTTCCGATTG | DKO #1  | DKO #3 |
| Hs SNAI1 Ex1.3 Rev   | aaacCAATCGGAAGCCTAACTACAc |         |        |
| Hs SNAI1 Ex2.1 Fwd   | CACCGGATGAGCATTGGCAGCGAGG | DKO #2  |        |
| Hs SNAI1 Ex2.1 Rev   | aaacCCTCGCTGCCAATGCTCATCc |         |        |
| Hs SNAI2 Ex2.1 Fwd   | CACCGGCTGTAGTTTGGCTTTTTGG | DKO #1  |        |
| Hs SNAI2 Ex2.1 Rev   | aaacCCAAAAGCCAAACTACAGCc  |         |        |
| Hs SNAI2 Ex2.2 Fwd   | CACCGGAAATGCTTCTTGACCAGGA | DKO #2  | DKO #3 |
| Hs SNAI2 Ex2.2 Rev   | aaacTCCTGGTCAAGAAGCATTTCc |         |        |
| Non Target (NT2) Fwd | CACCGACGTGTAAGGCGAACGCCTT |         |        |
| Non Target (NT2) Rev | aaacAAGGCGTTCGCCTTACACGTc |         |        |

\* BsmBI overhang

\* Target sequence

**Table 4: RT-qPCR primers**

| Name              | Sequence (5'->3')           | References                                                                                          |
|-------------------|-----------------------------|-----------------------------------------------------------------------------------------------------|
| H.s. MESP1 Fwd    | CGTCAGTTGTCCCTTGTCACCT      |                                                                                                     |
| H.s. MESP1 Rev    | GCTGGCTCTGTTGGAGACCT        |                                                                                                     |
| H.s. MESP2 Fwd    | GGCTTCCCTCTTTCCATCCA        |                                                                                                     |
| H.s. MESP2 Rev    | GGAGCCTTGGCTAAAGGAGA        |                                                                                                     |
| H.s. Bra/T Fwd    | TTTCCAGATGGTGAGAGCCG        | <a href="http://dx.doi.org/10.1101/665695">http://dx.doi.org/10.1101/665695</a>                     |
| H.s. Bra/T Rev    | CCGATGCCTCAACTCTCCAG        |                                                                                                     |
| H.s. Nanog Fwd    | CCCAAAGGCAAACAACCCACTT      |                                                                                                     |
| H.s. Nanog Rev    | AGCTGGGTGGAAGAGAACACA       |                                                                                                     |
| H.s. Vimentin Fwd | AGTCCACTGAGTACCGGAGAC       |                                                                                                     |
| H.s. Vimentin Rev | CATTTACGCATCTGGCGTTC        |                                                                                                     |
| H.s. Isl1 Fwd     | TTTATTGTCGGAAGACTTGCCACTT   |                                                                                                     |
| H.s. Isl1 Rev     | TCAAAGACCACCGTACAACCTTTATCT |                                                                                                     |
| H.s. Nkx2.5 Fwd   | ACCGATCCCACTCAACAGC         | 2018 10.7554/eLife.31706                                                                            |
| H.s. Nkx2.5 Rev   | CTCCGCAGGAGTGAATGCAA        |                                                                                                     |
| H.s. ANP/NPPA Fwd | GCTGCAGCTTCTGTCAACT         |                                                                                                     |
| H.s. ANP/NPPA Rev | AGGCGAGGAAGTCACCATCAA       |                                                                                                     |
| H.s. EOMES Fwd    | ATCATTACGAAACAGGGCAGGC      |                                                                                                     |
| H.s. EOMES Rev    | CGGGGTTGGTATTTGTGTAAGG      |                                                                                                     |
| H.s. SNAI1 Fwd    | GCTGCAGGACTCTAATCCAGAGTT    |                                                                                                     |
| H.s. SNAI1 Rev    | GACAGAGTCCAGATGAGCATTG      |                                                                                                     |
| H.s. SNAI2 Fwd    | AGATGCATATTCGGACCCAC        |                                                                                                     |
| H.s. SNAI2 Rev    | CCTCATGTTTGTGCAGGAGA        |                                                                                                     |
| H.s.. Sox1 Fwd    | ATGCACCGCTACGACATGG         | doi: 10.1038/nbt1163                                                                                |
| H.s.. Sox1 Rev    | CTCATGTAGCCCTGCGAGTTG       |                                                                                                     |
| H.s.. Sox17 Fwd   | GGCGCAGCAGAATCCAGA          | <a href="https://doi.org/10.1016/j.stem.2009.11.015">https://doi.org/10.1016/j.stem.2009.11.015</a> |
| H.s.. Sox17 Rev   | CCACGACTTGCCAGCAT           |                                                                                                     |
| H.s.. Sox2 Fwd    | TGGACAGTTACGCGCACAT         |                                                                                                     |
| H.s.. Sox2 Rev    | CGAGTAGGACATGCTGTAGGT       |                                                                                                     |
| H.s. SIP1 Fwd     | CGCTTGACATCACTGAAGGA        |                                                                                                     |
| H.s. SIP1 Rev     | CTTGCCACACTCTGTGCATT        |                                                                                                     |
| H.s. GAPDH Fwd    | GGACCTGACCTGCCGTCTAGAA      |                                                                                                     |
| H.s. GAPDH Rev    | GGTGTCGCTGTTGAAGTCAGAG      |                                                                                                     |



## Movie legends

### Supplementary movie 1

Phase contrast timelapse of hiPSC-derived cardiomyocytes obtained using the GiWi differentiation protocol. Spontaneous beating was observed 12 days after protocol initiation and immature cardiomyocytes were maintained in RPMI/B27 (+ Ins.).

### Supplementary movie 2

Timelapse imaging of mEGFP-TJP1 knock-in hiPSCs, starting 40h after CHIR-99021 treatment. Scale bar = 50  $\mu\text{m}$ . Maximum intensity projections are shown.

### Supplementary movie 3

Phase contrast timelapse of control (NT2) and *MESP1* knockout (#1 and #2) hiPSC-derived cardiomyocytes. Movies were recorded 12 days after GiWi protocol initiation using an EVOS FL microscope (Obj. x10). Scale bar = 400  $\mu\text{m}$ .

### Supplementary movie 4

Phase contrast timelapse of control (Ctr) and *BAX/BAK* DKO hiPSC-derived cardiomyocytes. Movies were recorded 12 days after GiWi protocol initiation using an EVOS FL microscope (Obj. x10). Scale bar = 400  $\mu\text{m}$ .
